# Supplementary material for: Quinoxaline derivatives with broadened absorption patterns
Source: Royal Society of Chemistry journal article supplement (doi:10.1039/c3ob41059e), 2013-01-01

## Supplementary Information

### Quinoxaline derivatives with broadened absorption patterns

Lidia Marin,<sup>a,b</sup> Laurence Lutsen,<sup>b</sup> Dirk Vanderzande<sup>a,b</sup> and Wouter Maes<sup>a,b,\*</sup>

<sup>a</sup> Design & Synthesis of Organic Semiconductors (DSOS), Institute for Materials Research (IMO), Hasselt University, Agoralaan 1 – Building D, 3590 Diepenbeek, Belgium

<sup>b</sup> IMEC, IMOMEC Ass. Lab., Universitaire Campus – Wetenschapspark 1, 3590 Diepenbeek, Belgium

Corresponding author. Tel.: +32 (0)11 26 8312; Fax: +32 (0)11 26 8299; E-mail: wouter.maes@uhasselt.be

#### Table of contents

|                                                                                                        |     |
|--------------------------------------------------------------------------------------------------------|-----|
| <b>Fig. S1.</b> <sup>1</sup> H NMR spectrum (300 MHz, CDCl <sub>3</sub> ) of <b>Q3</b>                 | S3  |
| <b>Fig. S2.</b> APT spectrum (75 MHz, CDCl <sub>3</sub> ) of <b>Q3</b>                                 | S4  |
| <b>Fig. S3.</b> <sup>1</sup> H NMR spectrum (300 MHz, CDCl <sub>3</sub> ) of 2-(2-ethylhexyl)thiophene | S5  |
| <b>Fig. S4.</b> APT spectrum (75 MHz, CDCl <sub>3</sub> ) of 2-(2-ethylhexyl)thiophene                 | S6  |
| <b>Fig. S5.</b> <sup>1</sup> H NMR spectrum (300 MHz, CDCl <sub>3</sub> ) of <b>D4</b>                 | S7  |
| <b>Fig. S6.</b> <sup>13</sup> C NMR spectrum (75 MHz, CDCl <sub>3</sub> ) of <b>D4</b>                 | S8  |
| <b>Fig. S7.</b> <sup>1</sup> H NMR spectrum (300 MHz, CDCl <sub>3</sub> ) of <b>Q4</b>                 | S9  |
| <b>Fig. S8.</b> <sup>13</sup> C NMR spectrum (75 MHz, CDCl <sub>3</sub> ) of <b>Q4</b>                 | S10 |
| <b>Fig. S9.</b> <sup>1</sup> H NMR spectrum (300 MHz, CDCl <sub>3</sub> ) of <b>M1</b>                 | S11 |
| <b>Fig. S10.</b> <sup>13</sup> C NMR spectrum (75 MHz, CDCl <sub>3</sub> ) of <b>M1</b>                | S12 |
| <b>Fig. S11.</b> <sup>1</sup> H NMR spectrum (300 MHz, CDCl <sub>3</sub> ) of <b>M2</b>                | S13 |
| <b>Fig. S12.</b> APT spectrum (75 MHz, CDCl <sub>3</sub> ) of <b>M2</b>                                | S14 |
| <b>Fig. S13.</b> <sup>1</sup> H NMR spectrum (300 MHz, CDCl <sub>3</sub> ) of <b>M3</b>                | S15 |
| <b>Fig. S14.</b> <sup>13</sup> C NMR spectrum (75 MHz, CDCl <sub>3</sub> ) of <b>M3</b>                | S16 |
| <b>Fig. S15.</b> <sup>1</sup> H NMR spectrum (300 MHz, CDCl <sub>3</sub> ) of <b>A4</b>                | S17 |
| <b>Fig. S16.</b> <sup>13</sup> C NMR spectrum (75 MHz, CDCl <sub>3</sub> ) of <b>A4</b>                | S18 |
| <b>Fig. S17.</b> <sup>1</sup> H NMR spectrum (300 MHz, CDCl <sub>3</sub> ) of <b>M4</b>                | S19 |
| <b>Fig. S18.</b> <sup>13</sup> C NMR spectrum (75 MHz, CDCl <sub>3</sub> ) of <b>M4</b>                | S20 |
| <b>Fig. S19.</b> <sup>1</sup> H NMR spectrum (300 MHz, CDCl <sub>3</sub> ) of <b>M5</b>                | S21 |
| <b>Fig. S20.</b> <sup>13</sup> C NMR spectrum (75 MHz, CDCl <sub>3</sub> ) of <b>M5</b>                | S22 |
| <b>Fig. S21.</b> <sup>1</sup> H NMR spectrum (300 MHz, CDCl <sub>3</sub> ) of <b>M6</b>                | S23 |
| <b>Fig. S22.</b> <sup>13</sup> C NMR spectrum (75 MHz, CDCl <sub>3</sub> ) of <b>M6</b>                | S24 |
| <b>Fig. S23.</b> <sup>1</sup> H NMR spectrum (300 MHz, CDCl <sub>3</sub> ) of <b>T1</b>                | S25 |
| <b>Fig. S24.</b> APT spectrum (75 MHz, CDCl <sub>3</sub> ) of <b>T1</b>                                | S26 |
| <b>Fig. S25.</b> <sup>1</sup> H NMR spectrum (300 MHz, CDCl <sub>3</sub> ) of <b>T2</b>                | S27 |
| <b>Fig. S26.</b> <sup>13</sup> C NMR spectrum (75 MHz, CDCl <sub>3</sub> ) of <b>T2</b>                | S28 |
| <b>Fig. S27.</b> <sup>1</sup> H NMR spectrum (300 MHz, CDCl <sub>3</sub> ) of <b>T3</b>                | S29 |
| <b>Fig. S28.</b> APT spectrum (75 MHz, CDCl <sub>3</sub> ) of <b>T3</b>                                | S30 |

|                                                                                                                                                             |     |
|-------------------------------------------------------------------------------------------------------------------------------------------------------------|-----|
| <b>Fig. S29.</b> $^1\text{H}$ NMR spectrum (300 MHz, $\text{CDCl}_3$ ) of <b>T4</b>                                                                         | S31 |
| <b>Fig. S30.</b> $^{13}\text{C}$ NMR spectrum (75 MHz, $\text{CDCl}_3$ ) of <b>T4</b>                                                                       | S32 |
| <b>Fig. S31.</b> $^1\text{H}$ NMR spectrum (300 MHz, $\text{CDCl}_3$ ) of <b>7</b>                                                                          | S33 |
| <b>Fig. S32.</b> $^{13}\text{C}$ NMR spectrum (75 MHz, $\text{CDCl}_3$ ) of <b>7</b>                                                                        | S34 |
| <b>Fig. S33.</b> $^1\text{H}$ NMR spectrum (300 MHz, $\text{CDCl}_3$ ) of <b>8</b>                                                                          | S35 |
| <b>Fig. S34.</b> $^{13}\text{C}$ NMR spectrum (75 MHz, $\text{CDCl}_3$ ) of <b>8</b>                                                                        | S36 |
| <b>Fig. S35.</b> $^1\text{H}$ NMR spectrum (300 MHz, $\text{CDCl}_3$ ) of <b>9</b>                                                                          | S37 |
| <b>Fig. S36.</b> $^{13}\text{C}$ NMR spectrum (75 MHz, $\text{CDCl}_3$ ) of <b>9</b>                                                                        | S38 |
| <b>Fig. S37.</b> $^1\text{H}$ NMR spectrum (300 MHz, $\text{CDCl}_3$ ) of <b>T5</b>                                                                         | S39 |
| <b>Fig. S38.</b> APT spectrum (75 MHz, $\text{CDCl}_3$ ) of <b>T5</b>                                                                                       | S40 |
| <b>Table S1.</b> UV-Vis and PL data of all quinoxaline derivatives ( <b>Q1–Q4</b> ), monomers ( <b>M1–M6</b> ) and triads ( <b>T1–T5</b> )                  | S41 |
| <b>Fig. S39.</b> UV-Vis absorption spectra (in film) of all quinoxaline derivatives ( <b>Q1–Q4</b> ), monomers ( <b>M1–M6</b> ) and triads ( <b>T1–T5</b> ) | S42 |
| <b>Fig. S40.</b> PL spectra (in $\text{CHCl}_3$ solution) of quinoxaline triads <b>T1–T5</b>                                                                | S43 |

**Fig. S1.**  $^1\text{H}$  NMR spectrum (300 MHz,  $\text{CDCl}_3$ ) of **Q3**

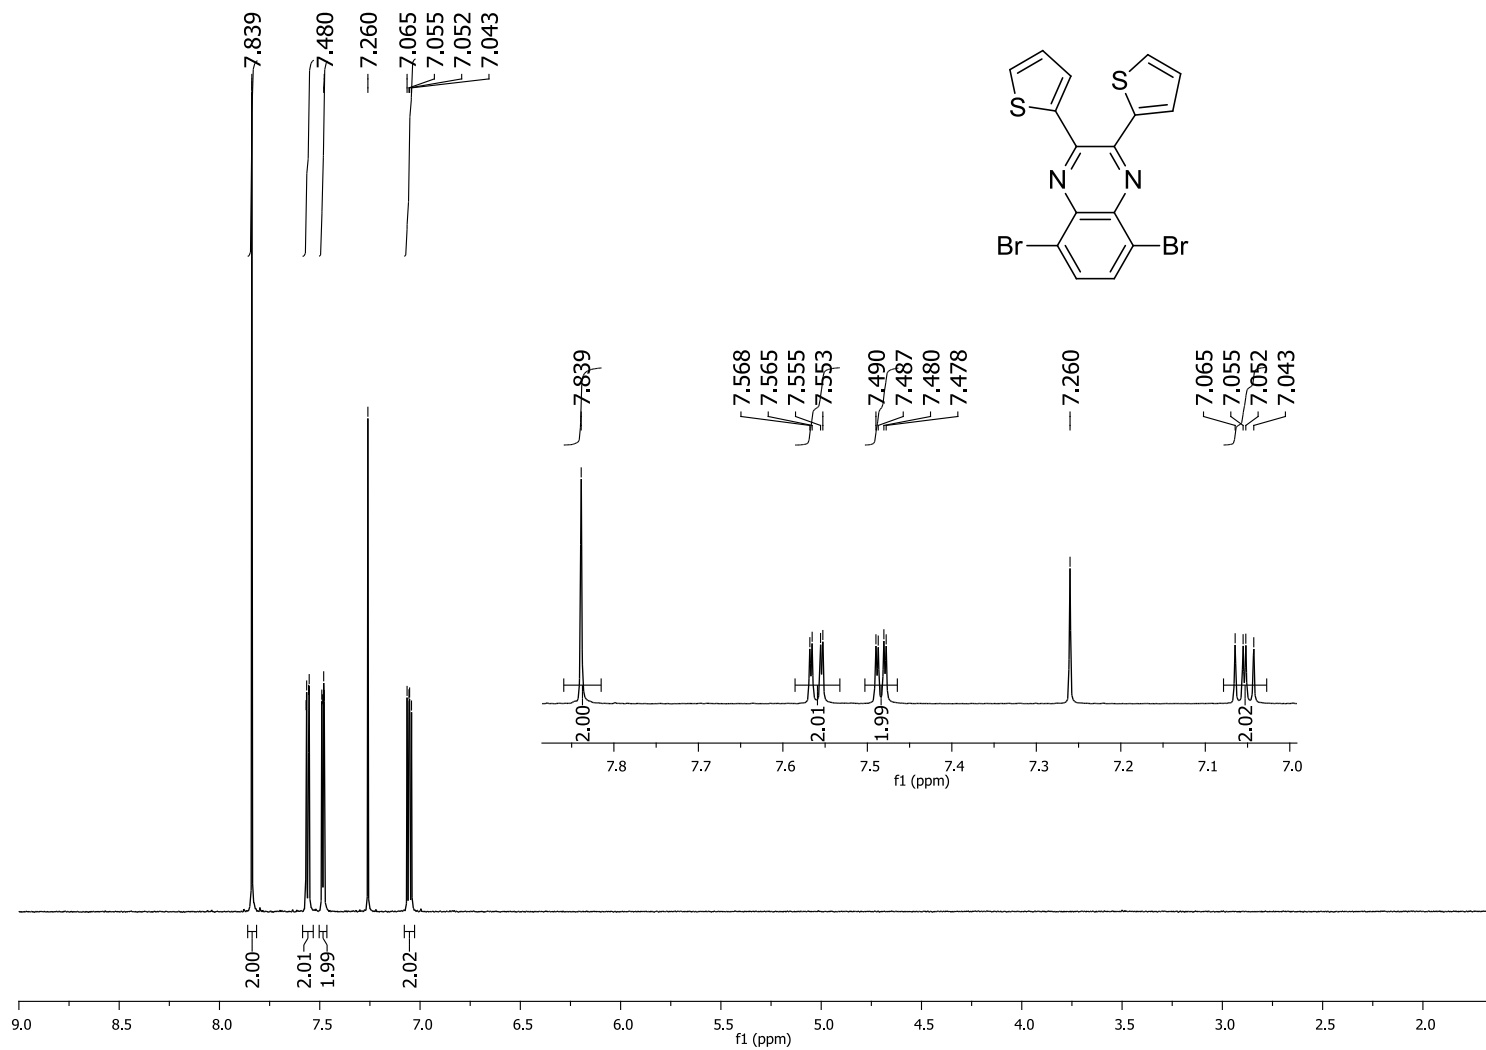

**Fig. S2.** APT spectrum (75 MHz, CDCl<sub>3</sub>) of **Q3**

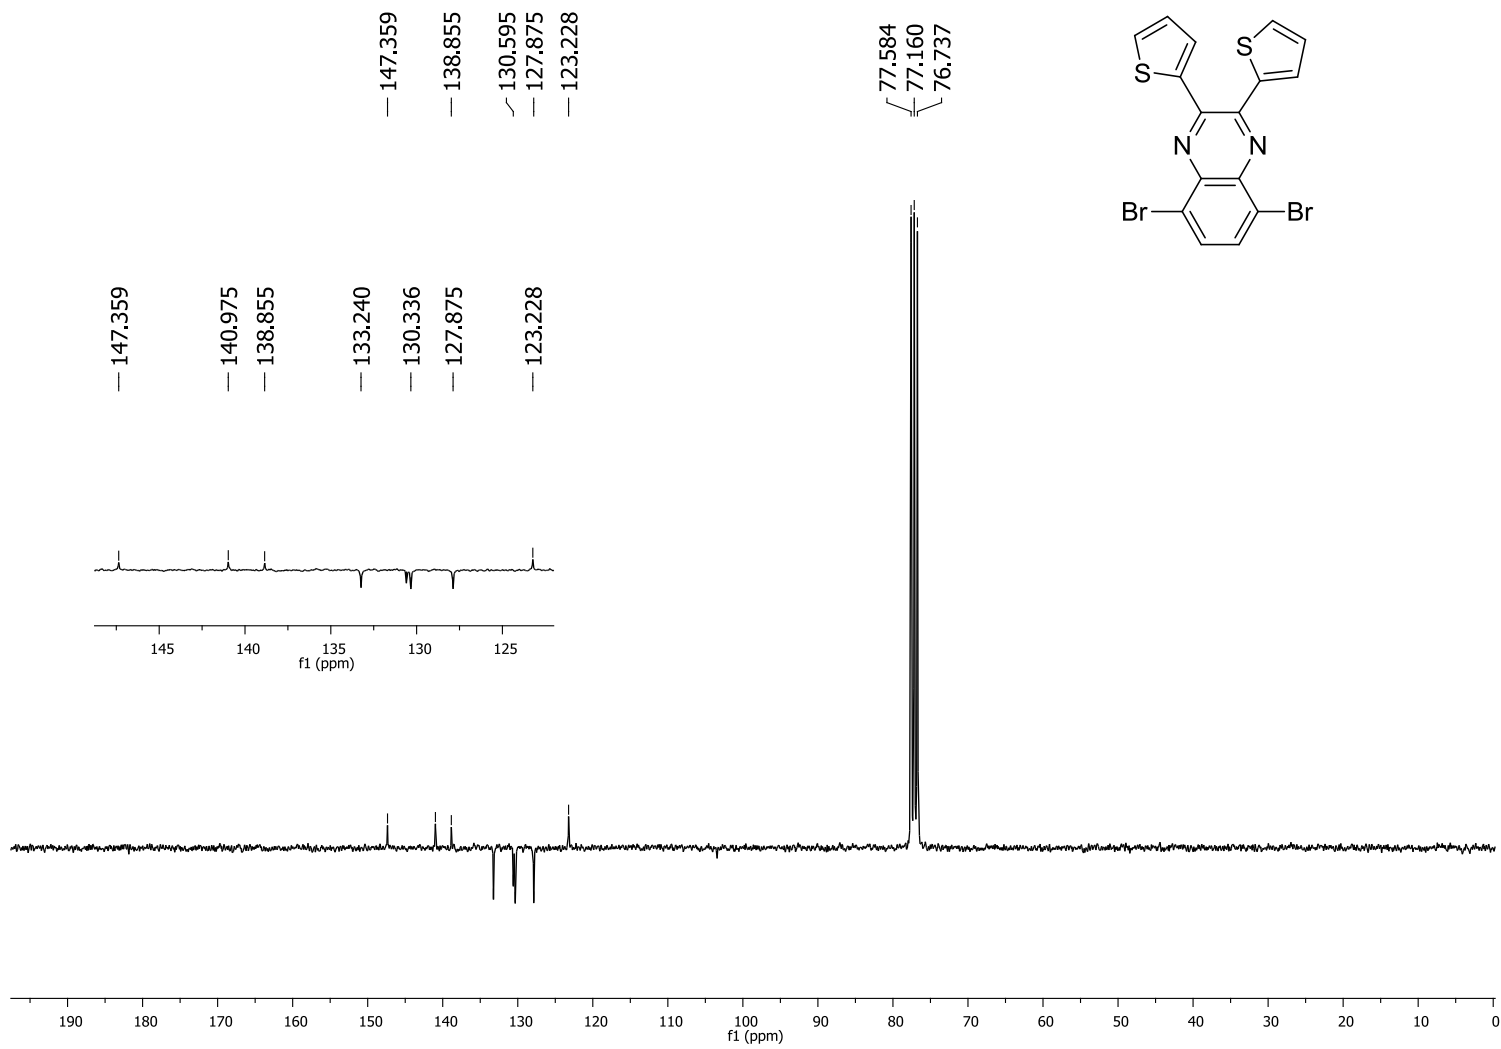

**Fig. S3.**  $^1\text{H}$  NMR spectrum (300 MHz,  $\text{CDCl}_3$ ) of 2-(2-ethylhexyl)thiophene

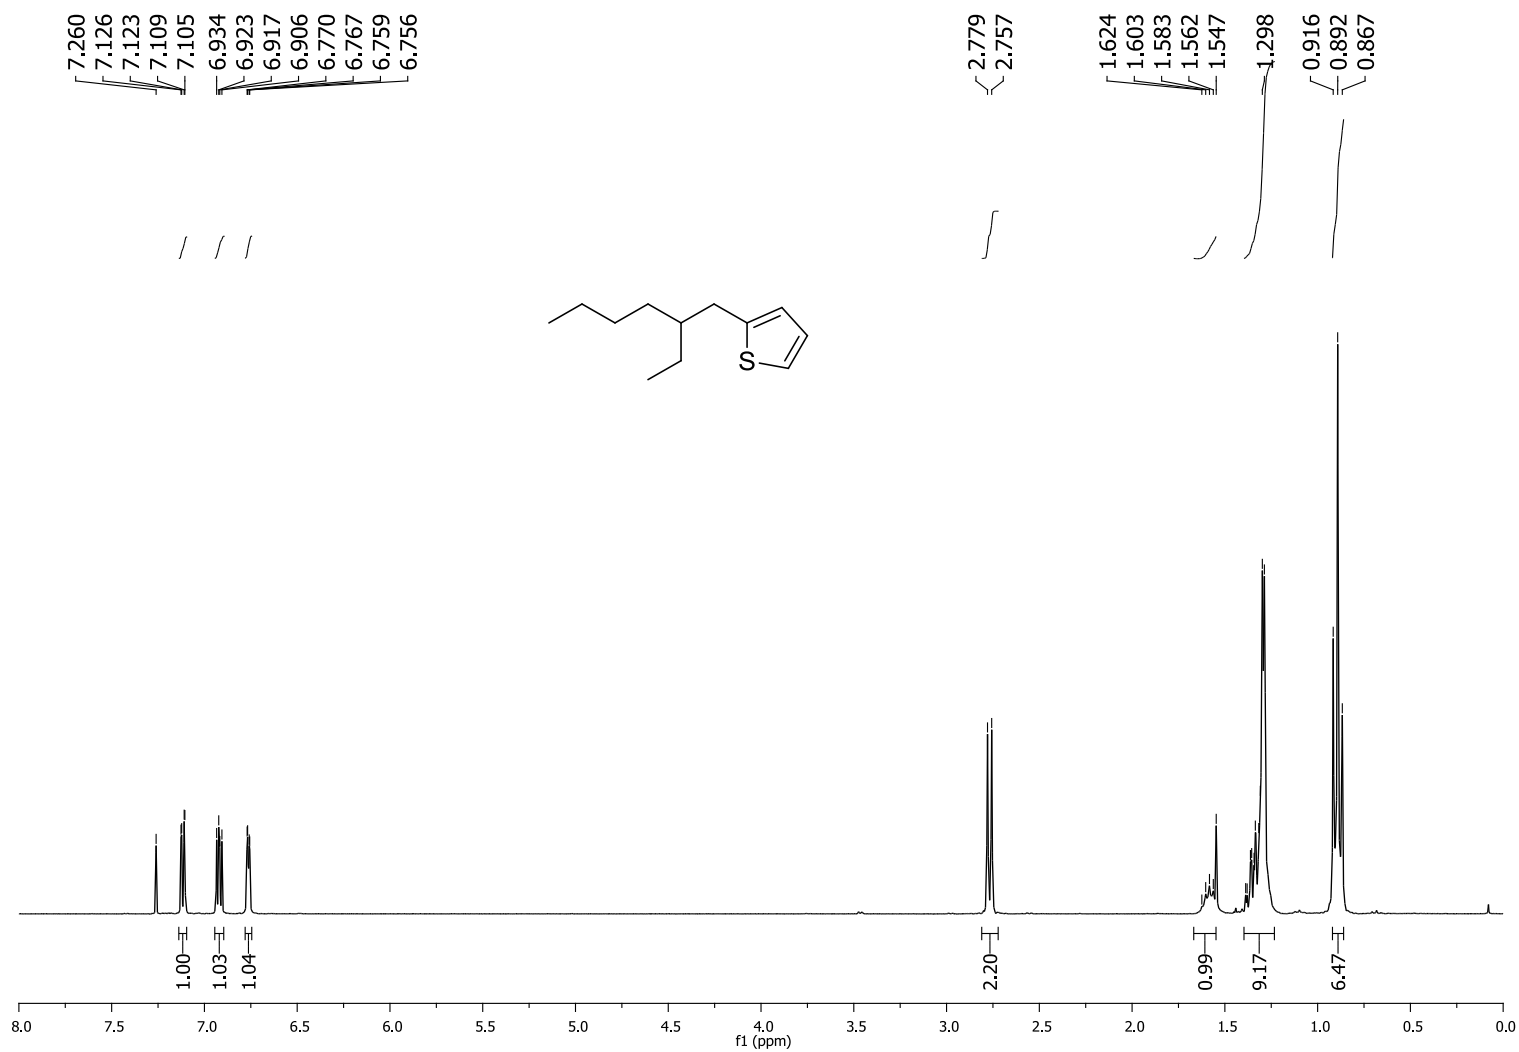

**Fig. S4.** APT spectrum (75 MHz, CDCl<sub>3</sub>) of 2-(2-ethylhexyl)thiophene

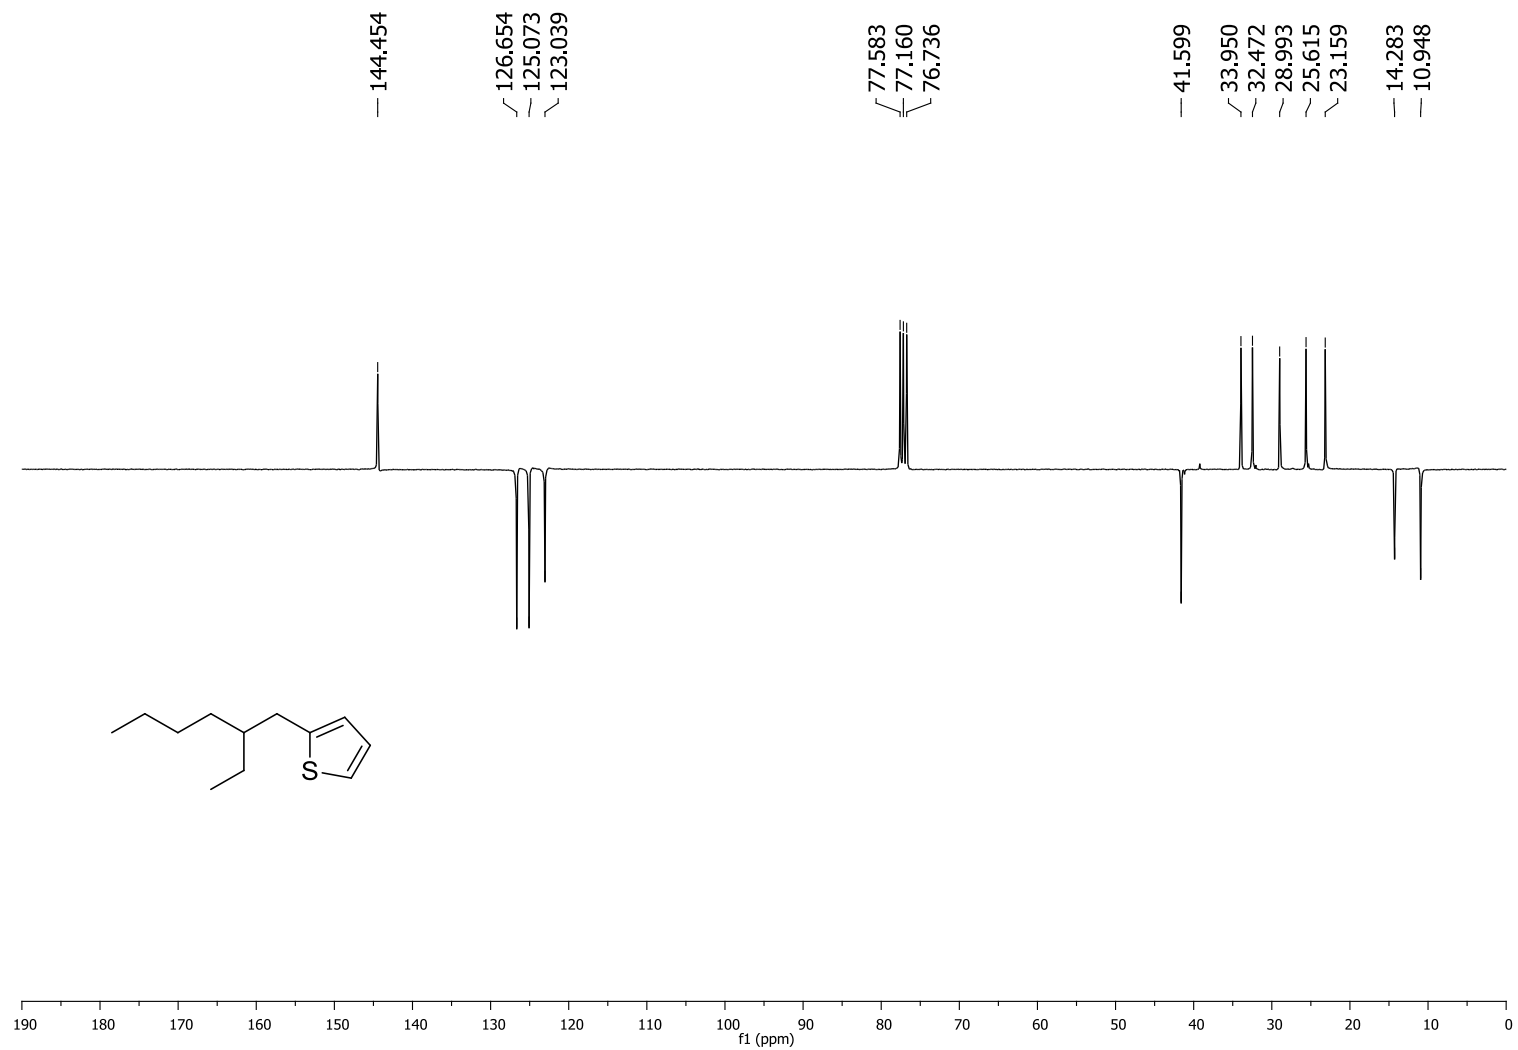

**Fig. S5.**  $^1\text{H}$  NMR spectrum (300 MHz,  $\text{CDCl}_3$ ) of **D4**

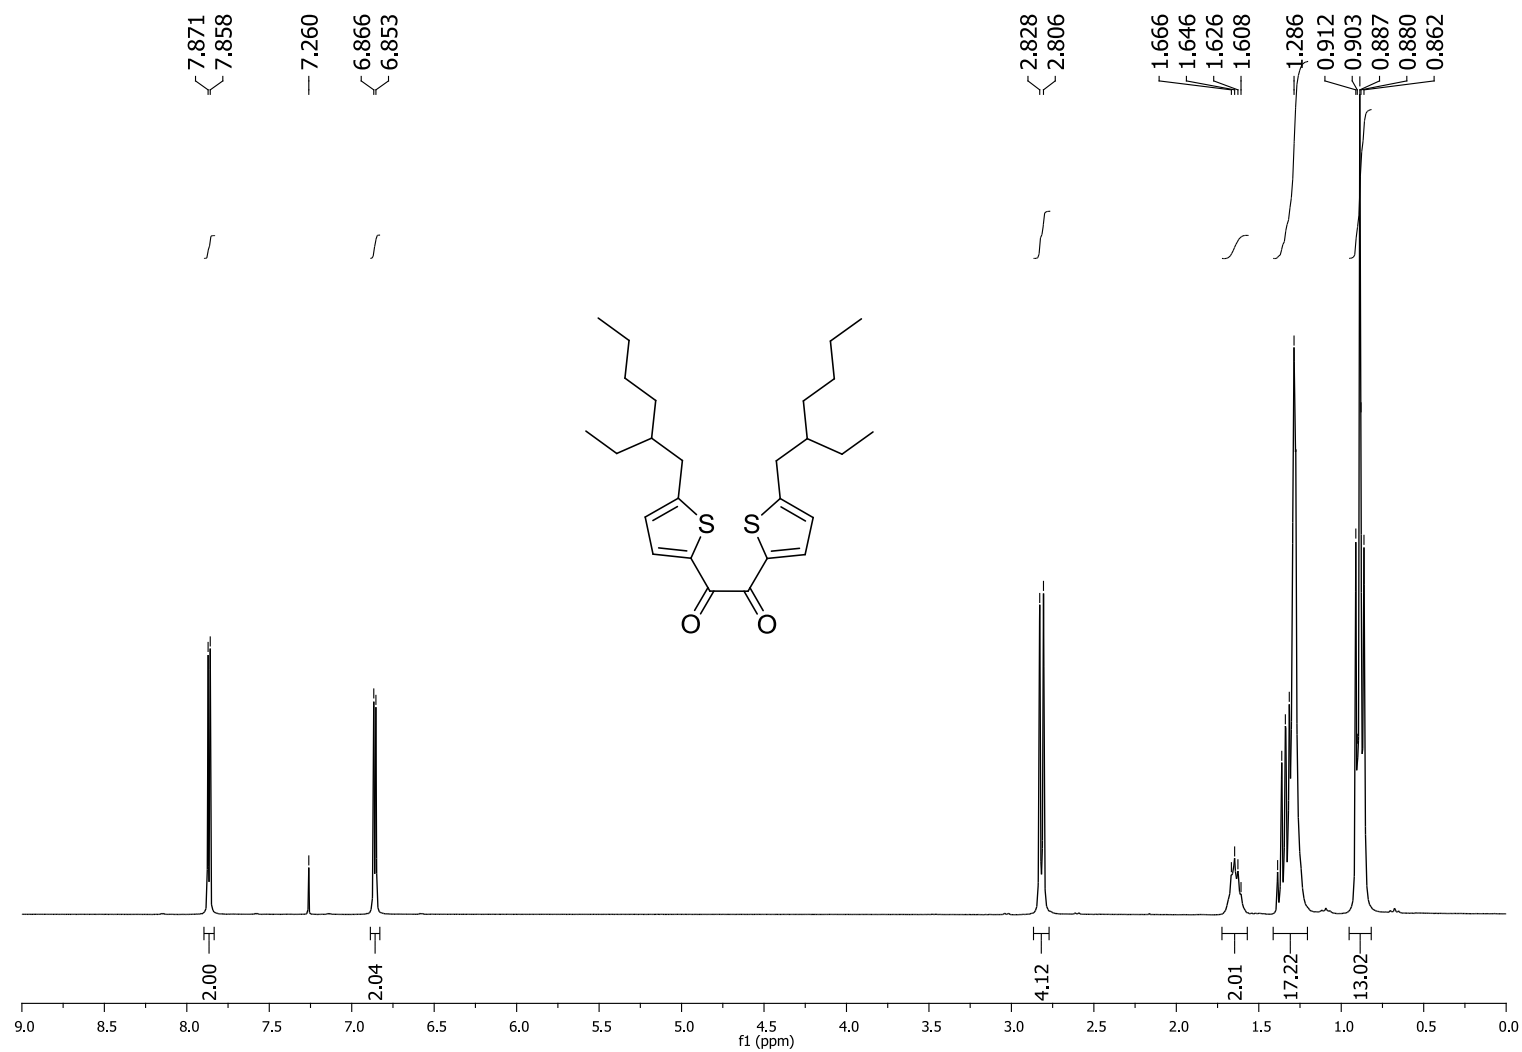

**Fig. S6.**  $^{13}\text{C}$  NMR spectrum (75 MHz,  $\text{CDCl}_3$ ) of **D4**

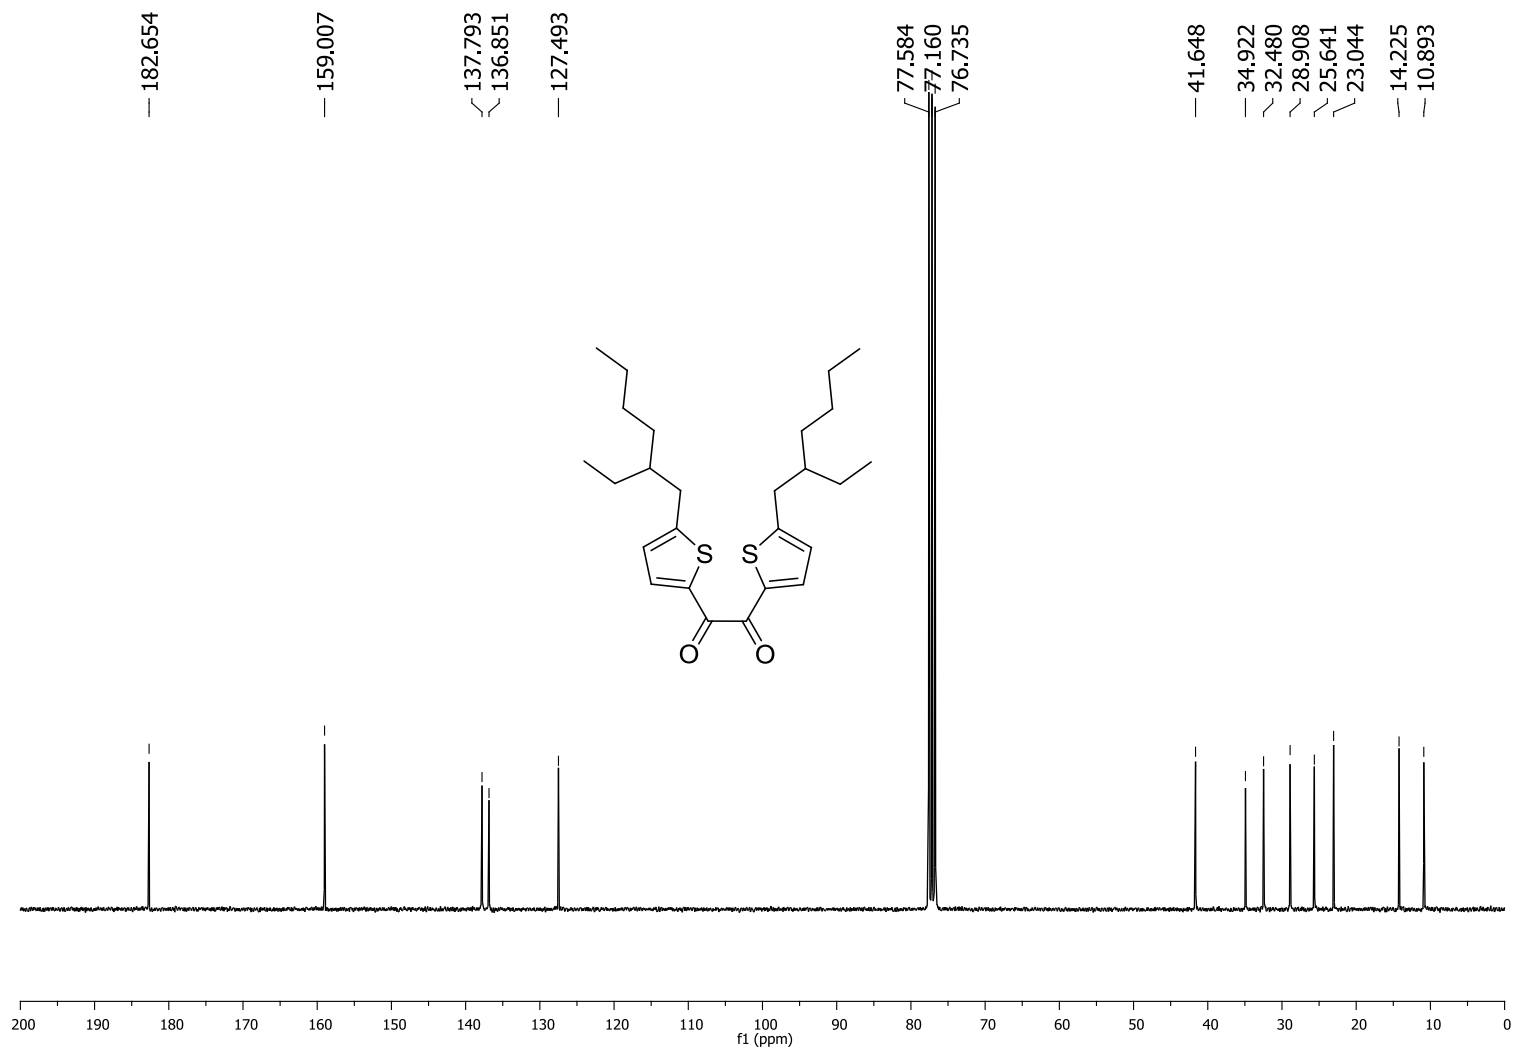



**Fig. S7.**  $^1\text{H}$  NMR spectrum (300 MHz,  $\text{CDCl}_3$ ) of **Q4**

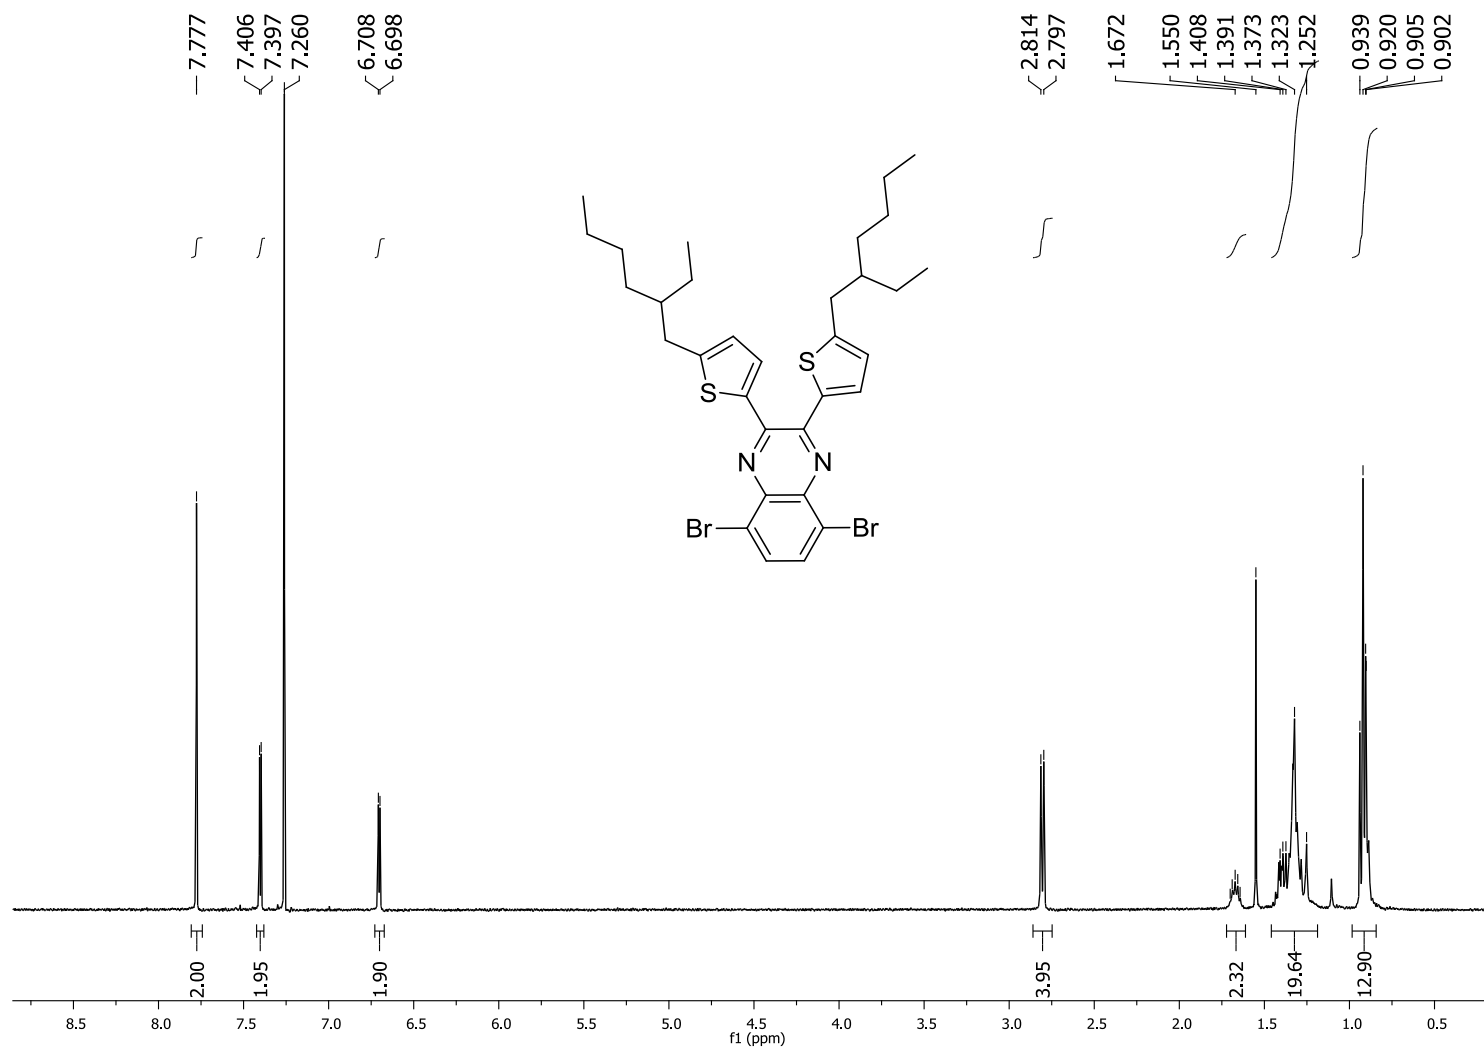

**Fig. S8.**  $^{13}\text{C}$  NMR spectrum (75 MHz,  $\text{CDCl}_3$ ) of **Q4**

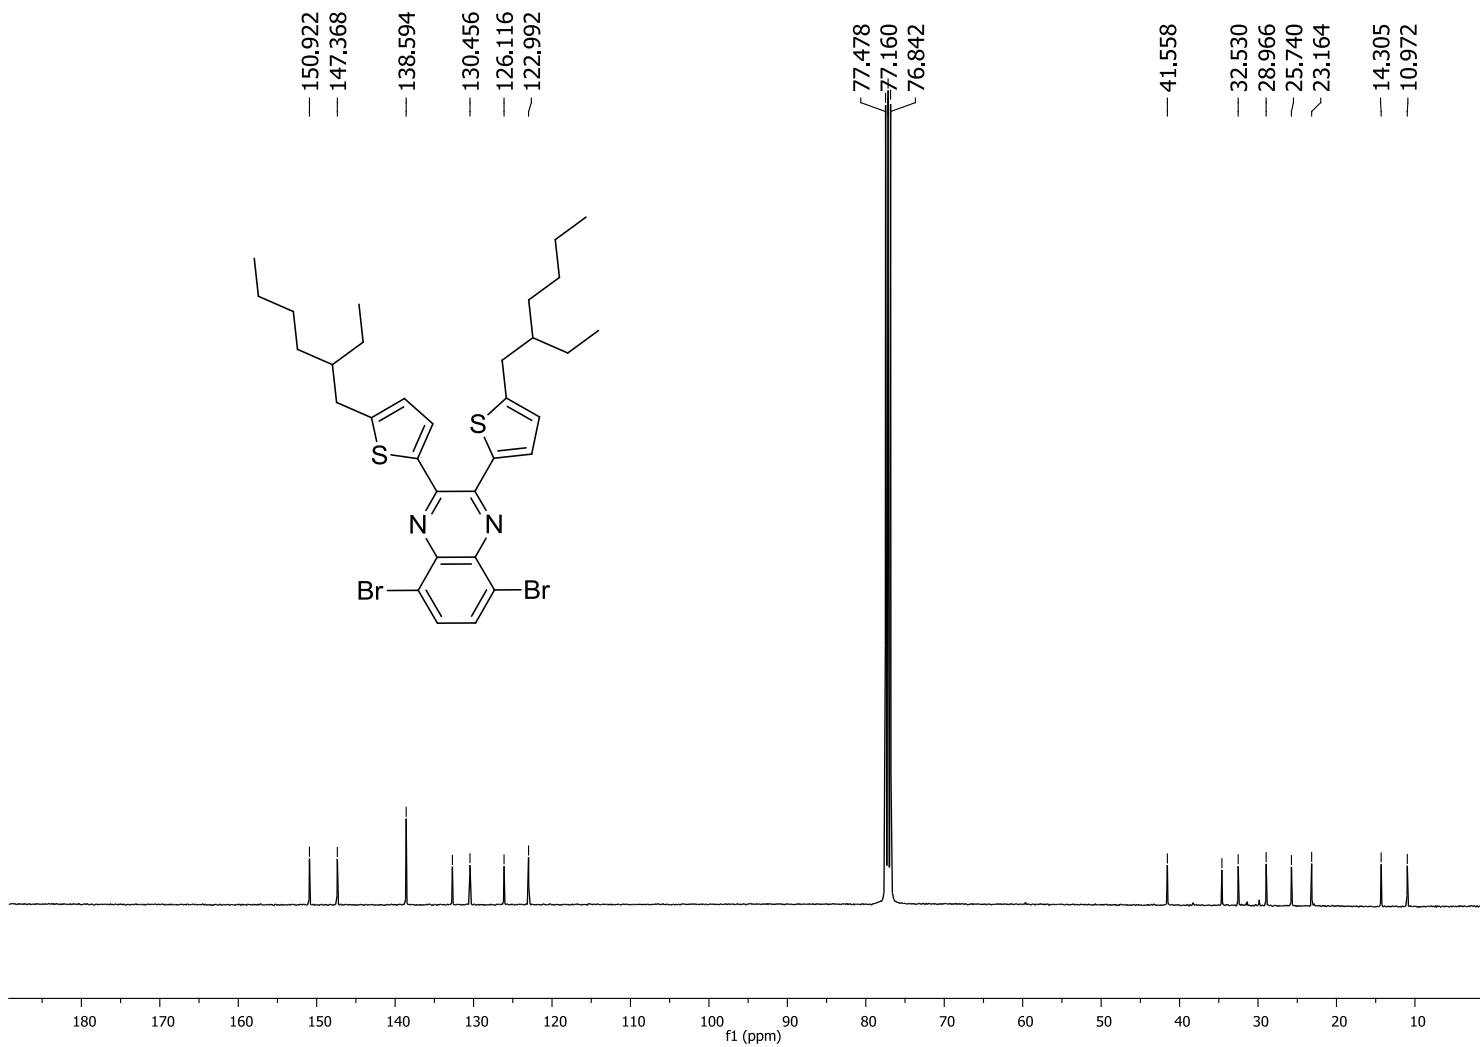

**Fig. S9.**  $^1\text{H}$  NMR spectrum (300 MHz,  $\text{CDCl}_3$ ) of **M1**

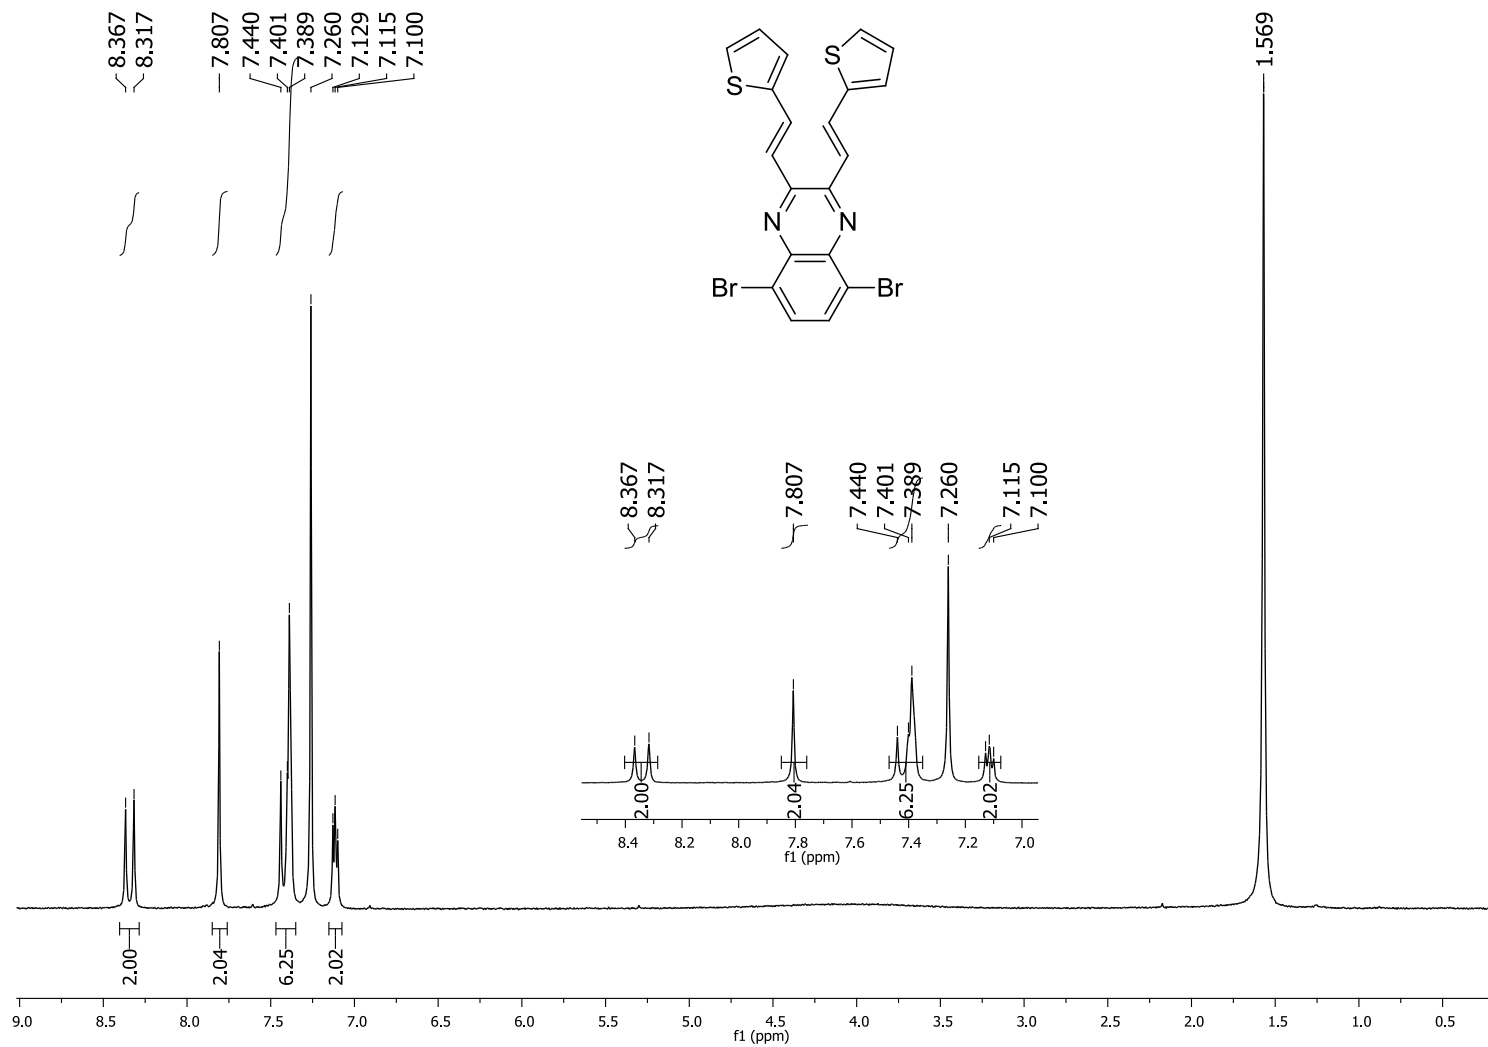

**Fig. S10.**  $^{13}\text{C}$  NMR spectrum (75 MHz,  $\text{CDCl}_3$ ) of **M1**

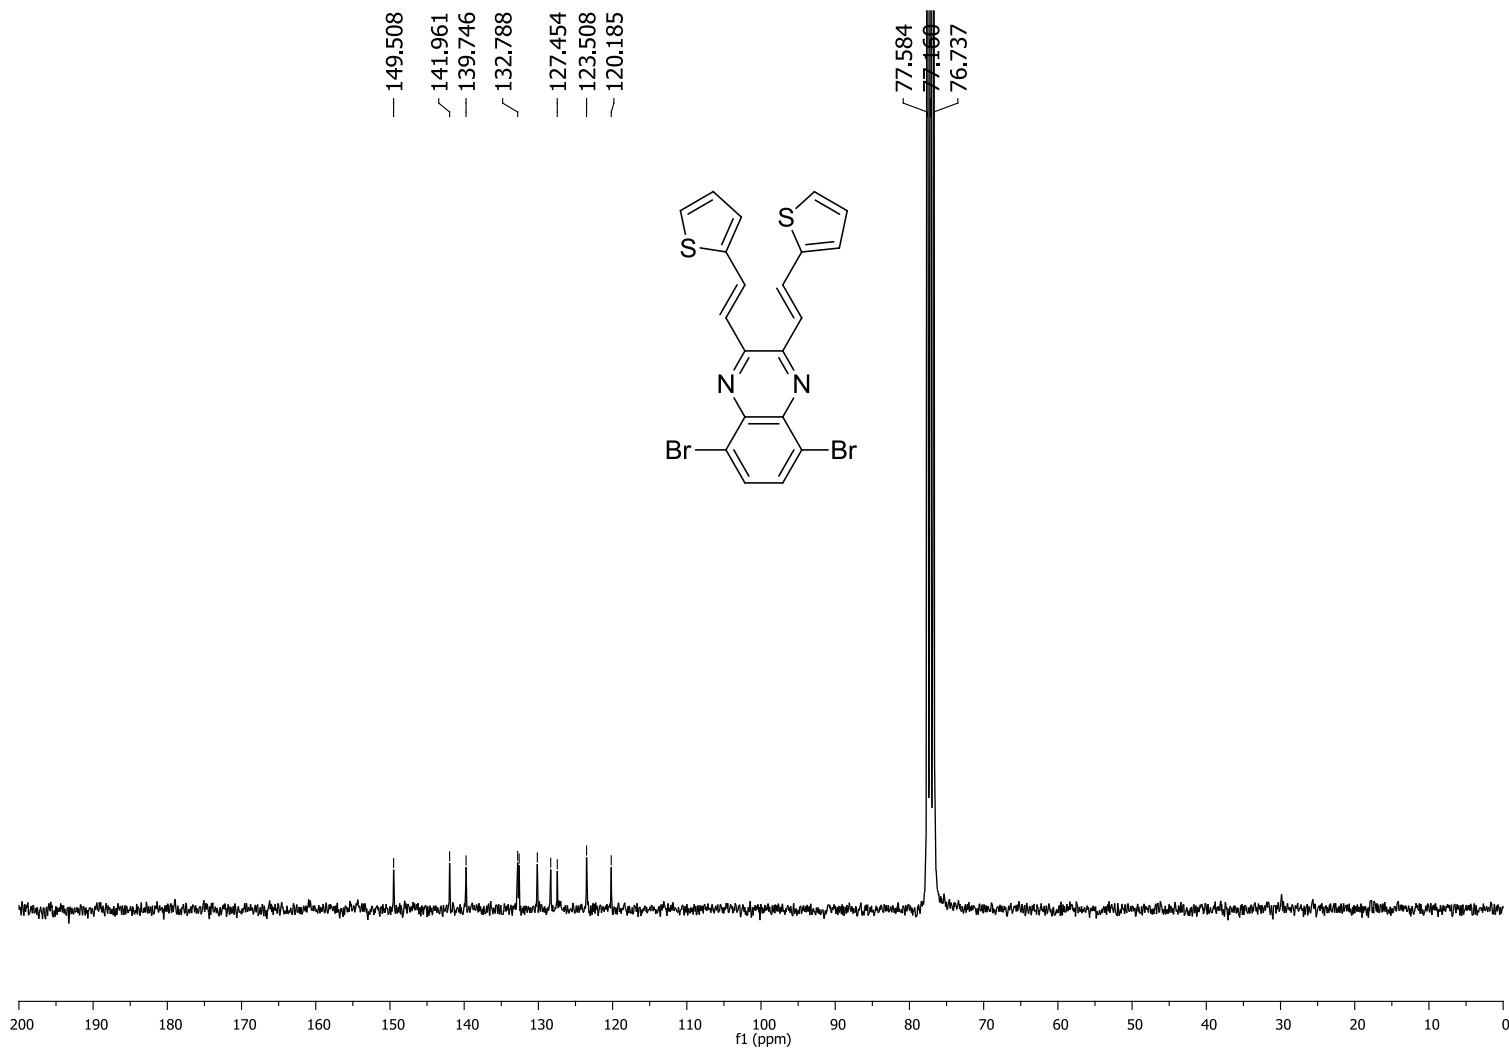

**Fig. S11.**  $^1\text{H}$  NMR spectrum (300 MHz,  $\text{CDCl}_3$ ) of **M2**

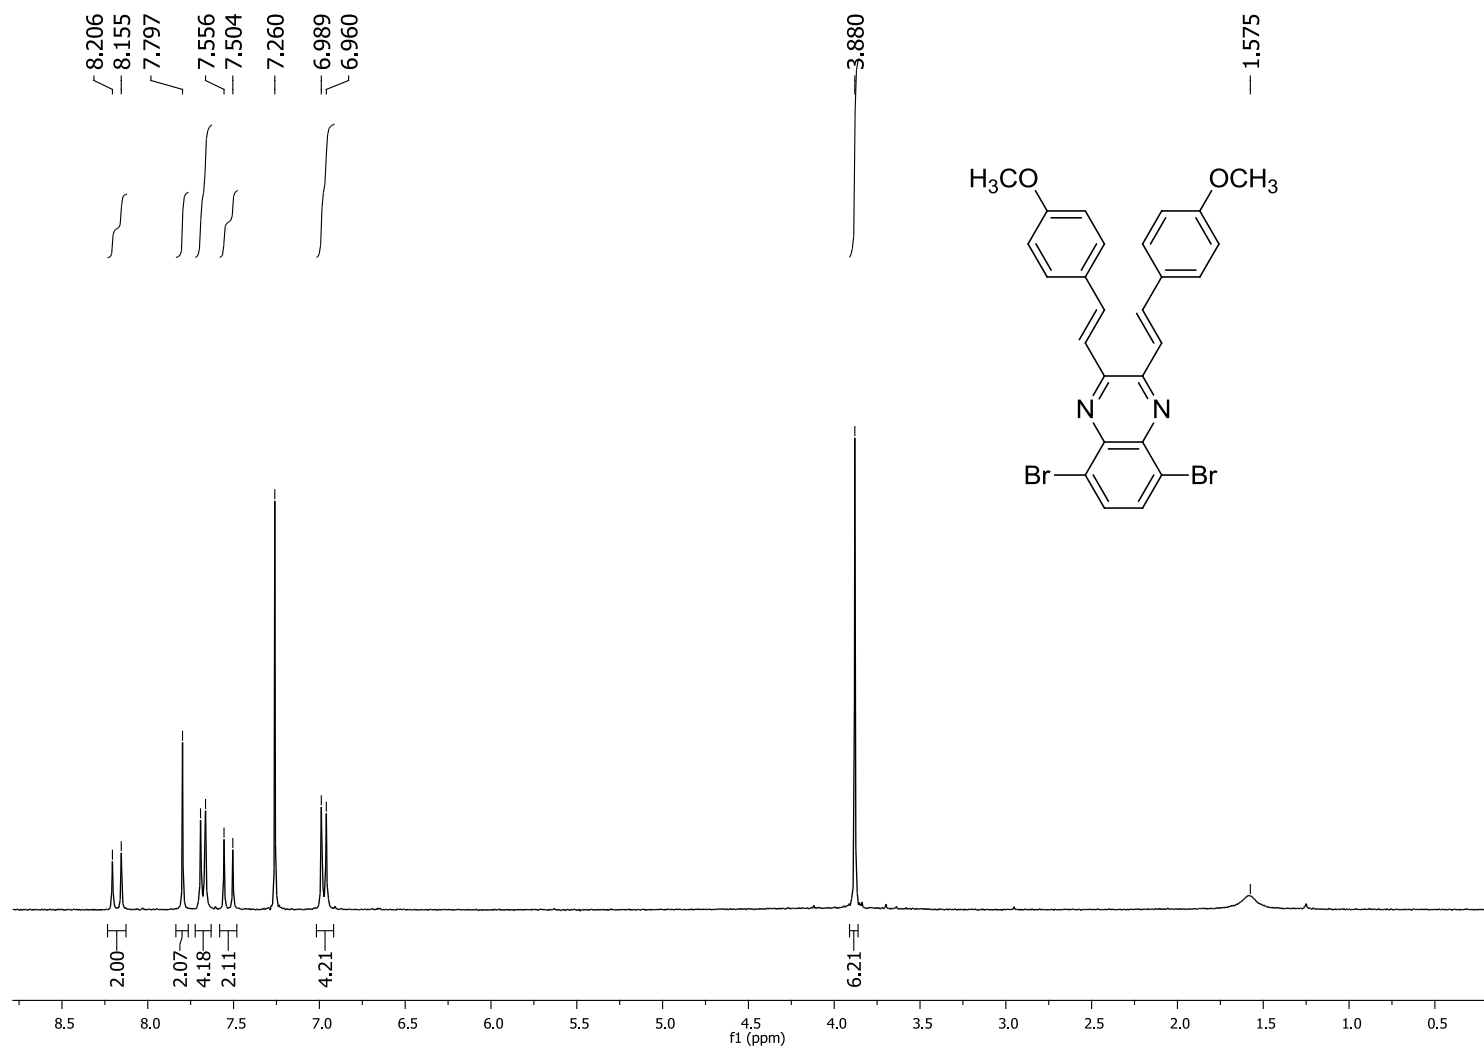

**Fig. S12.** APT spectrum (75 MHz, CDCl<sub>3</sub>) of **M2**

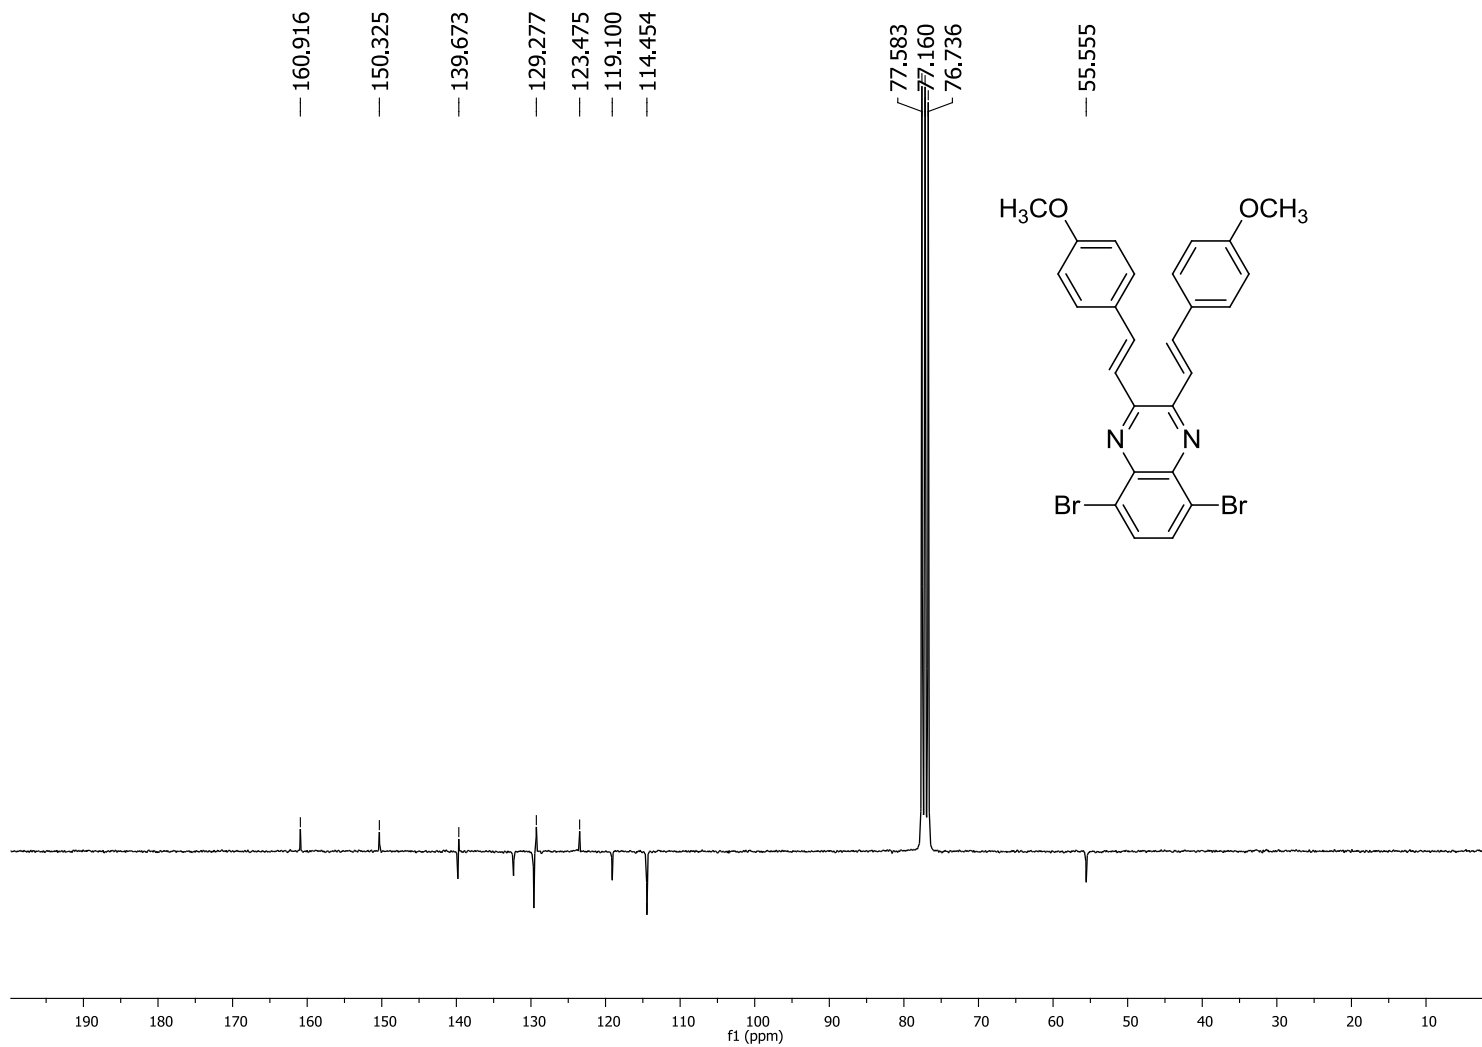

**Fig. S13.**  $^1\text{H}$  NMR spectrum (300 MHz,  $\text{CDCl}_3$ ) of **M3**

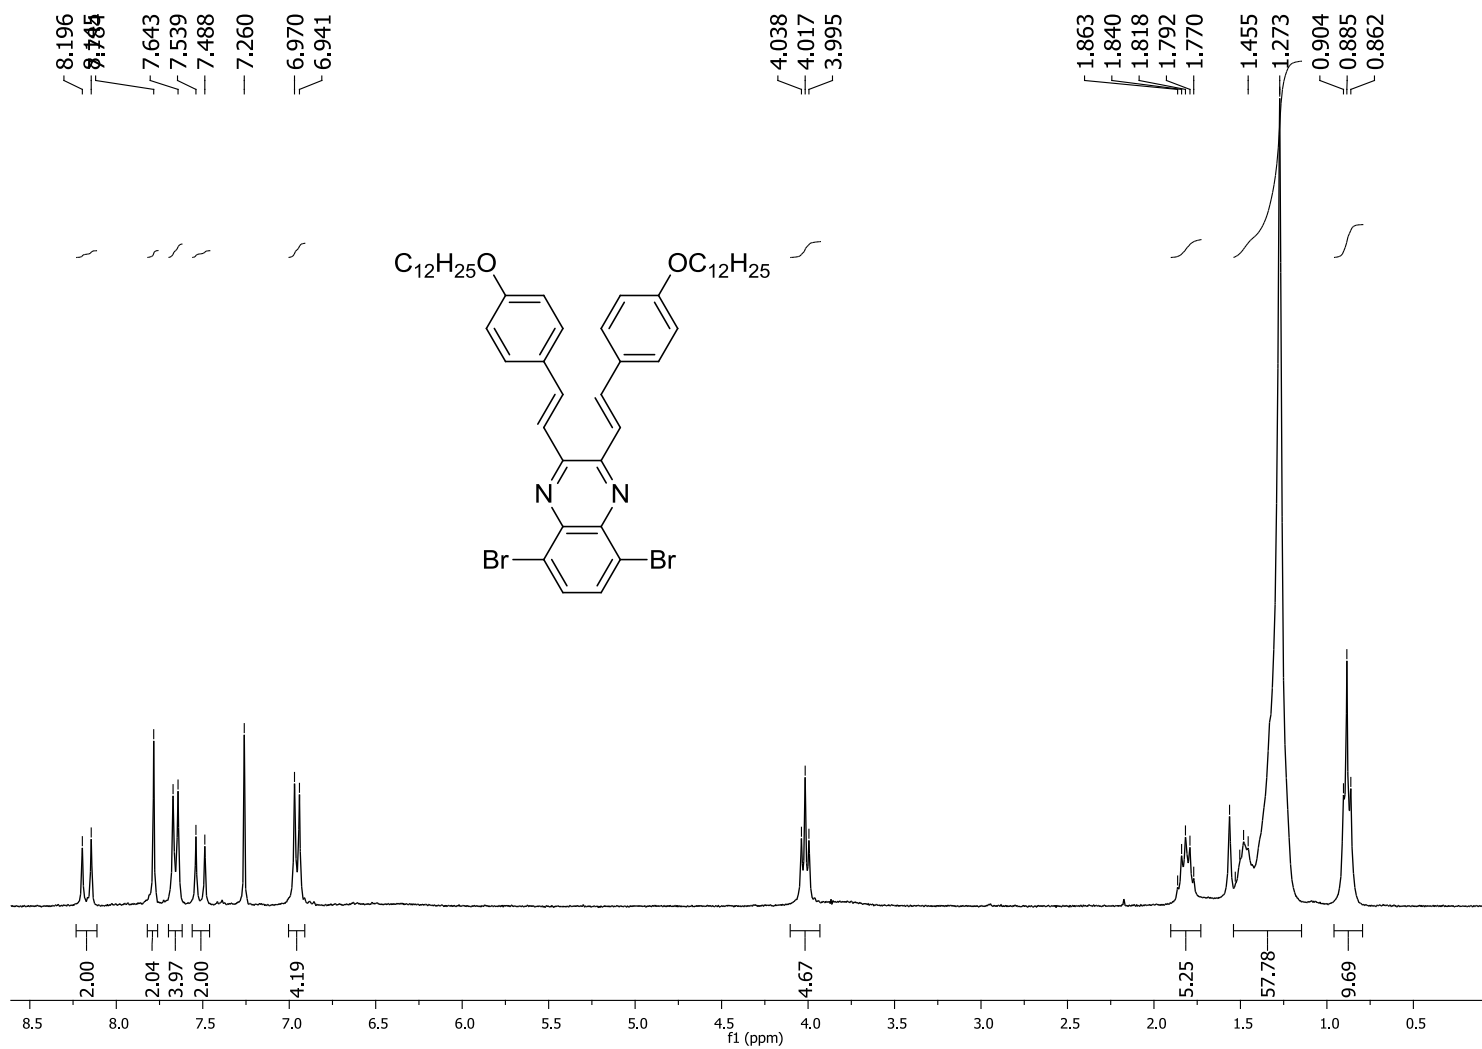

**Fig. S14.**  $^{13}\text{C}$  NMR spectrum (75 MHz,  $\text{CDCl}_3$ ) of **M3**

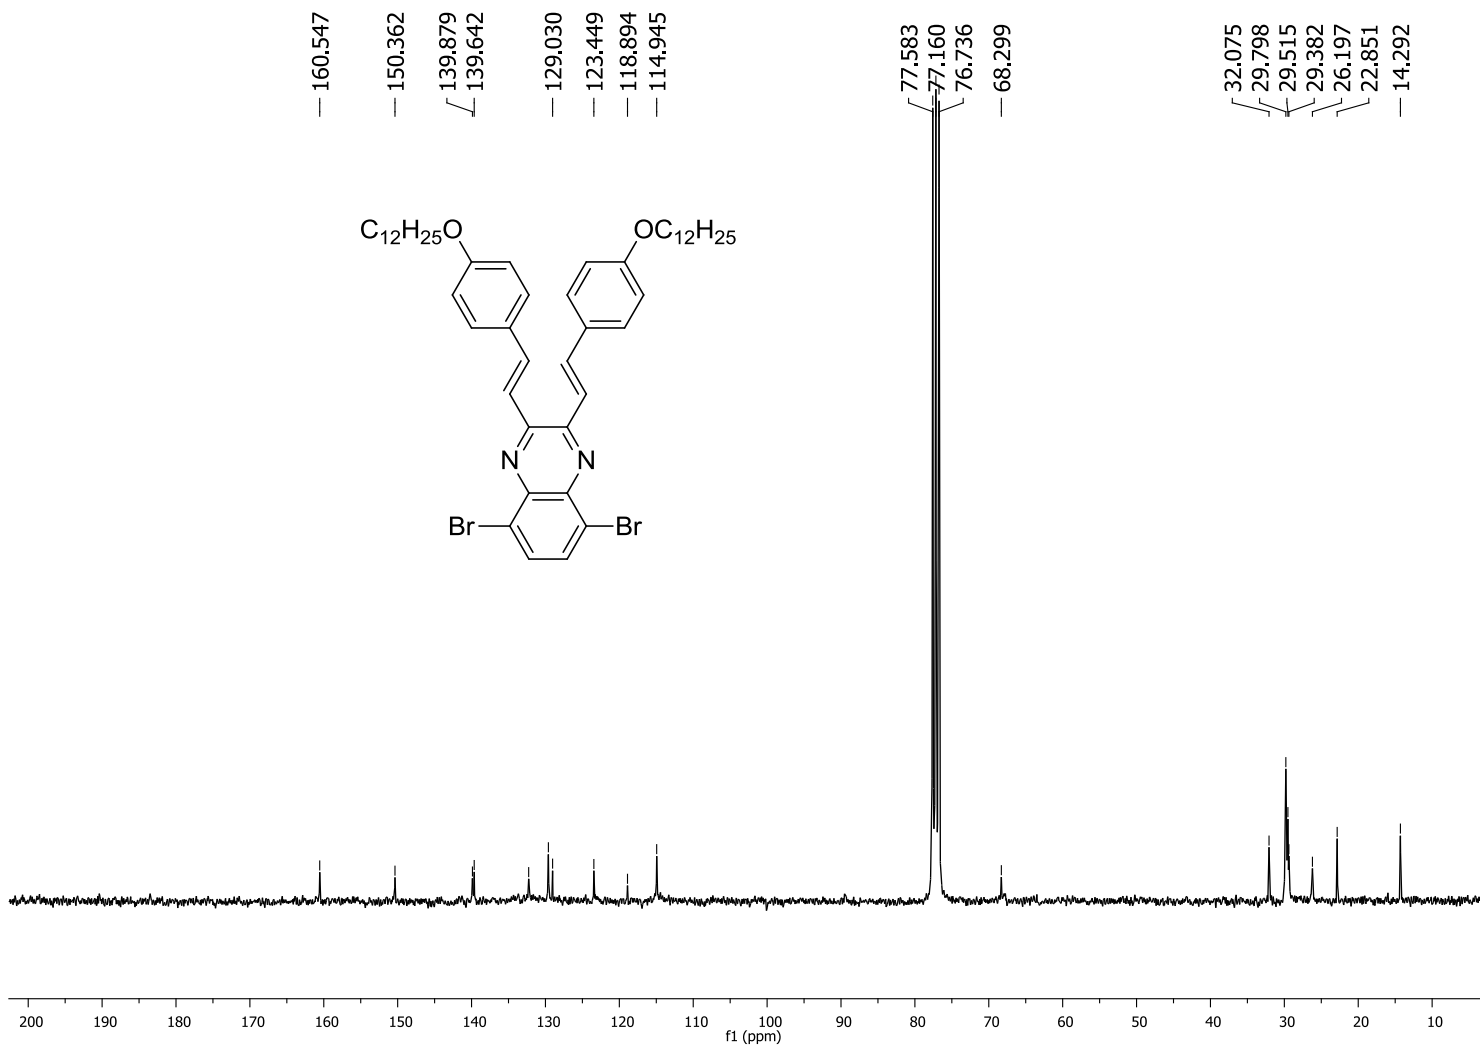



**Fig. S15.**  $^1\text{H}$  NMR spectrum (300 MHz,  $\text{CDCl}_3$ ) of **A4**

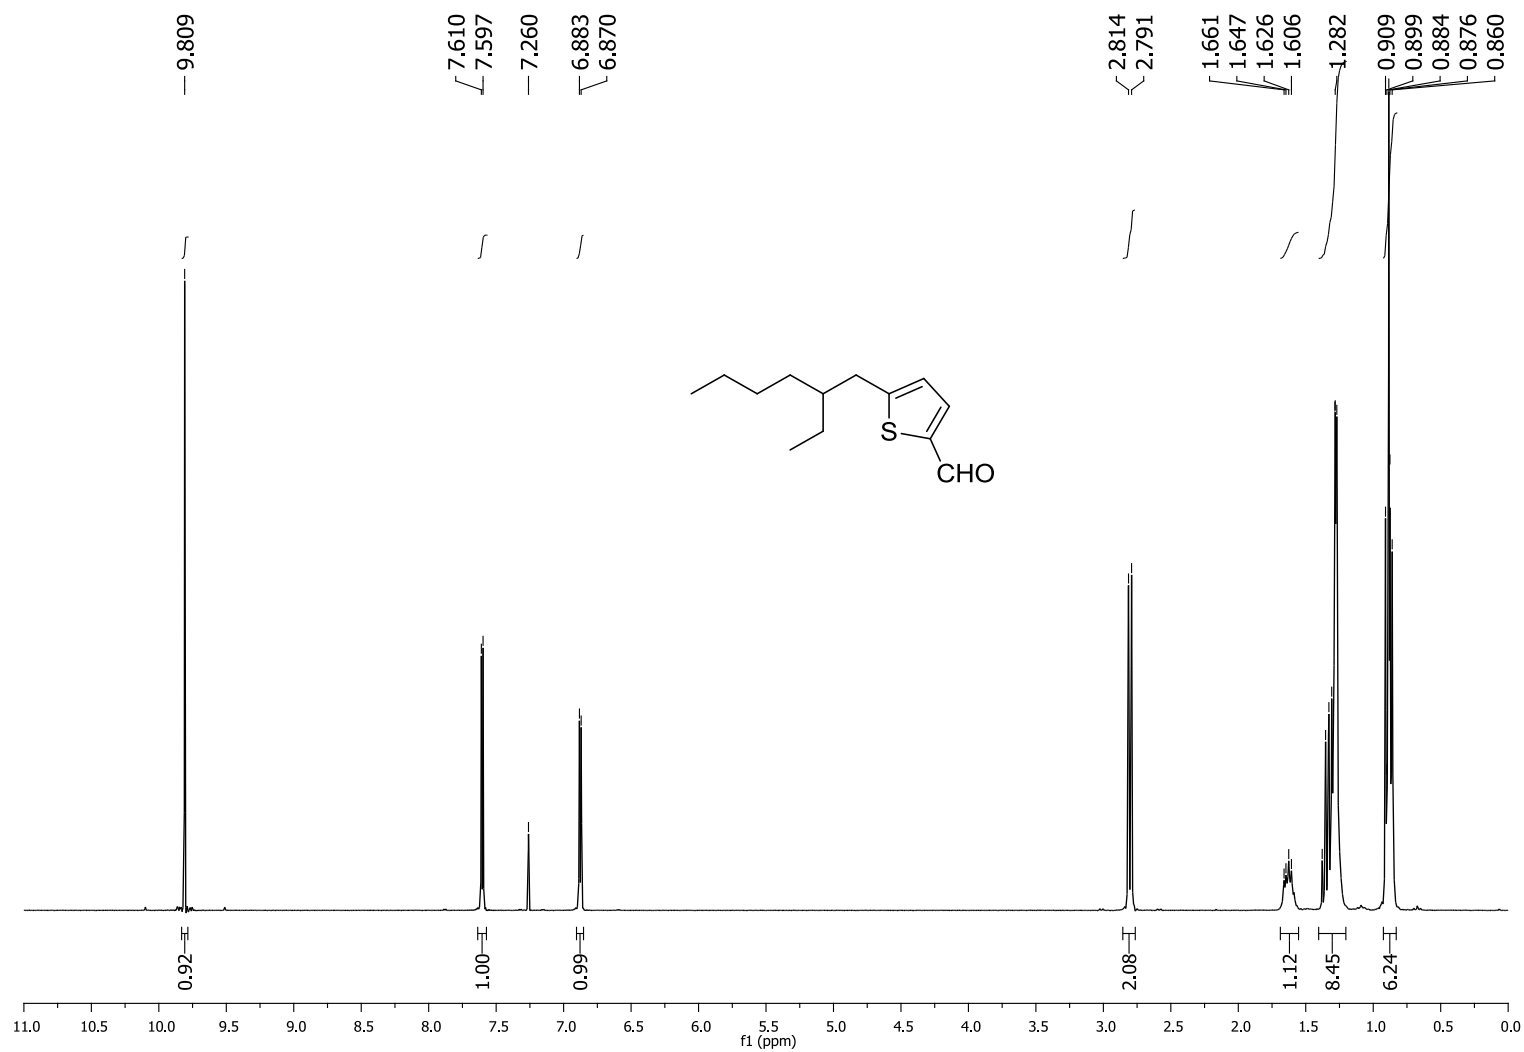

**Fig. S16.**  $^{13}\text{C}$  NMR spectrum (75 MHz,  $\text{CDCl}_3$ ) of **A4**

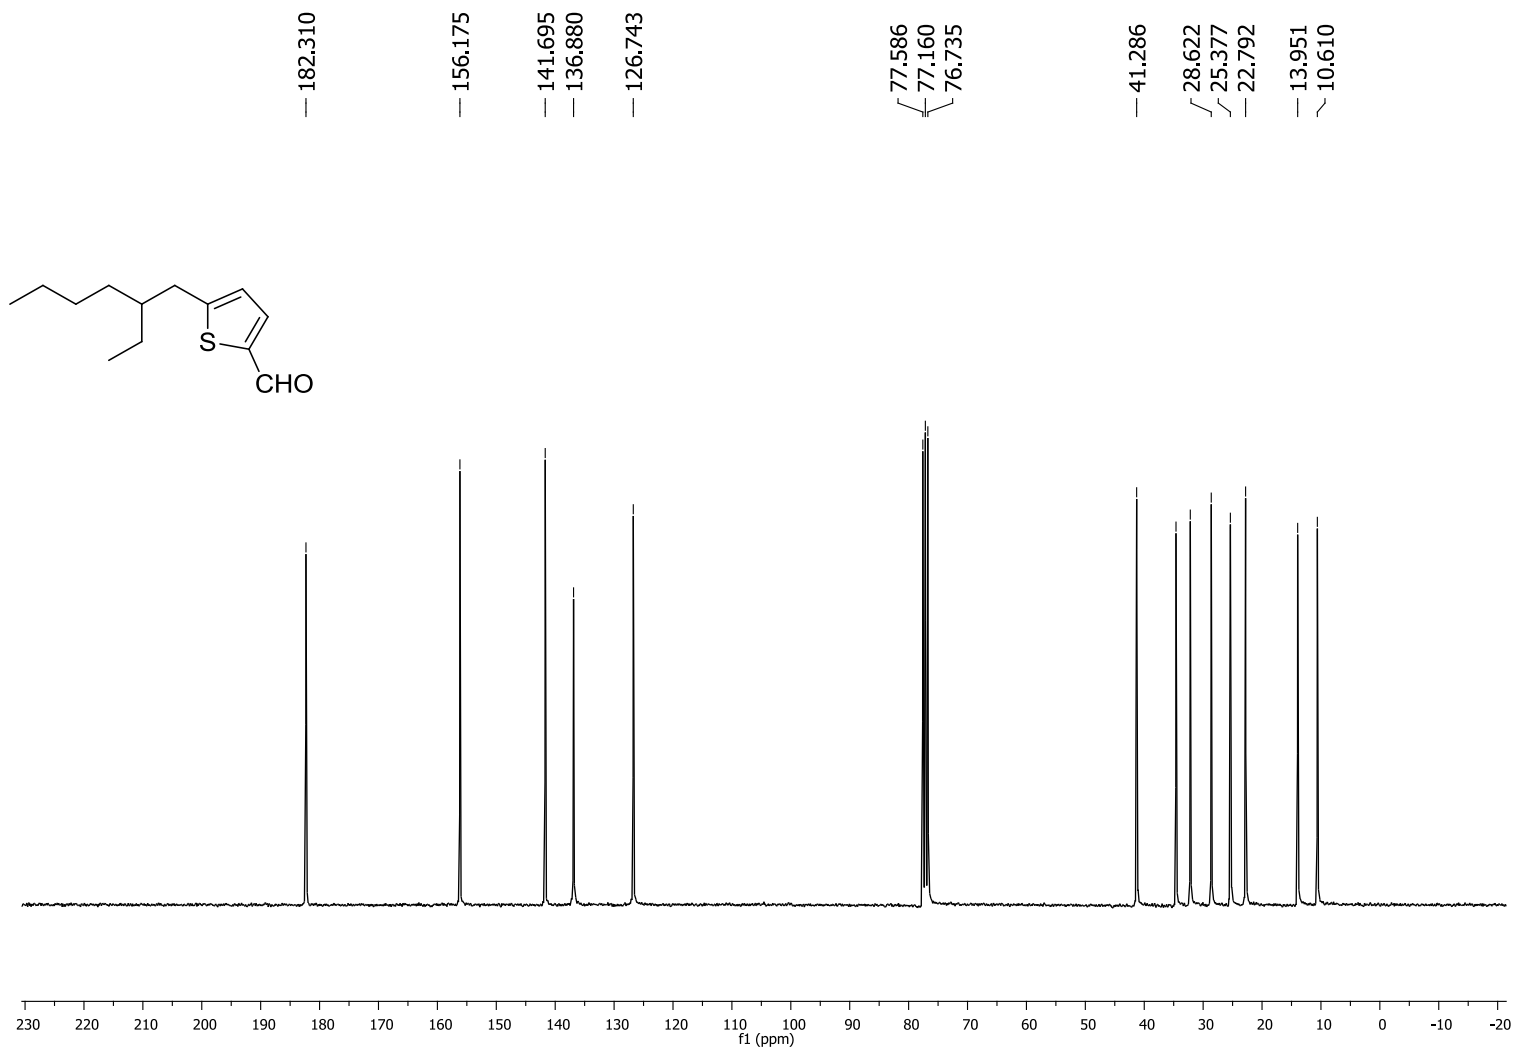

**Fig. S17.**  $^1\text{H}$  NMR spectrum (300 MHz,  $\text{CDCl}_3$ ) of **M4**

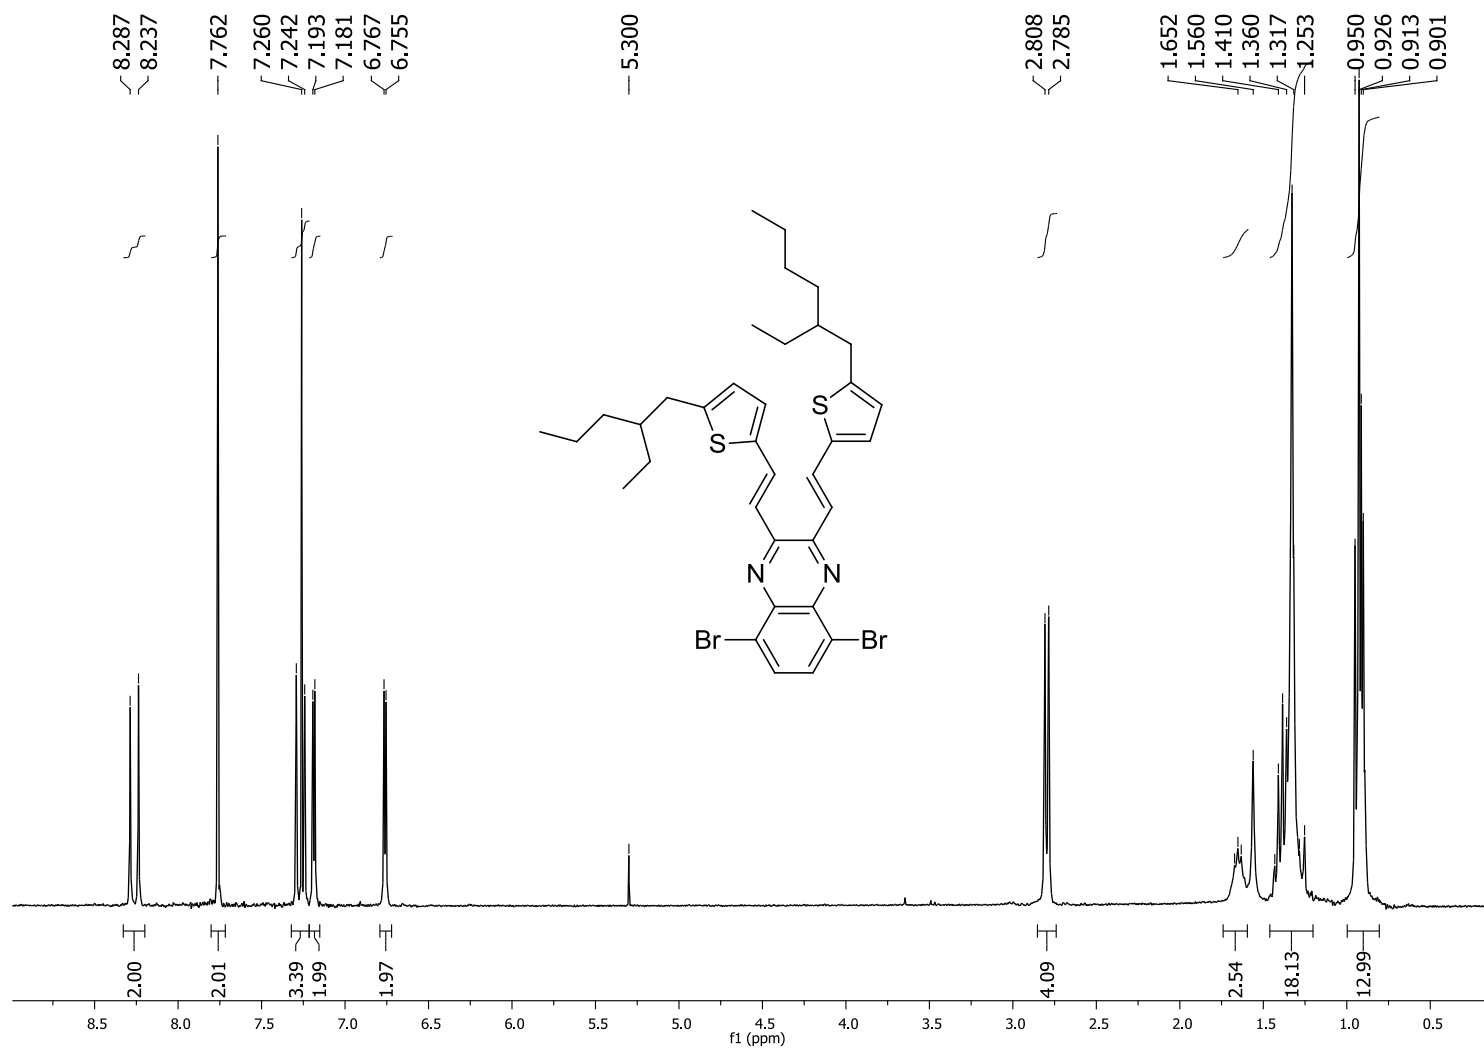

**Fig. S18.**  $^{13}\text{C}$  NMR spectrum (75 MHz,  $\text{CDCl}_3$ ) of **M4**

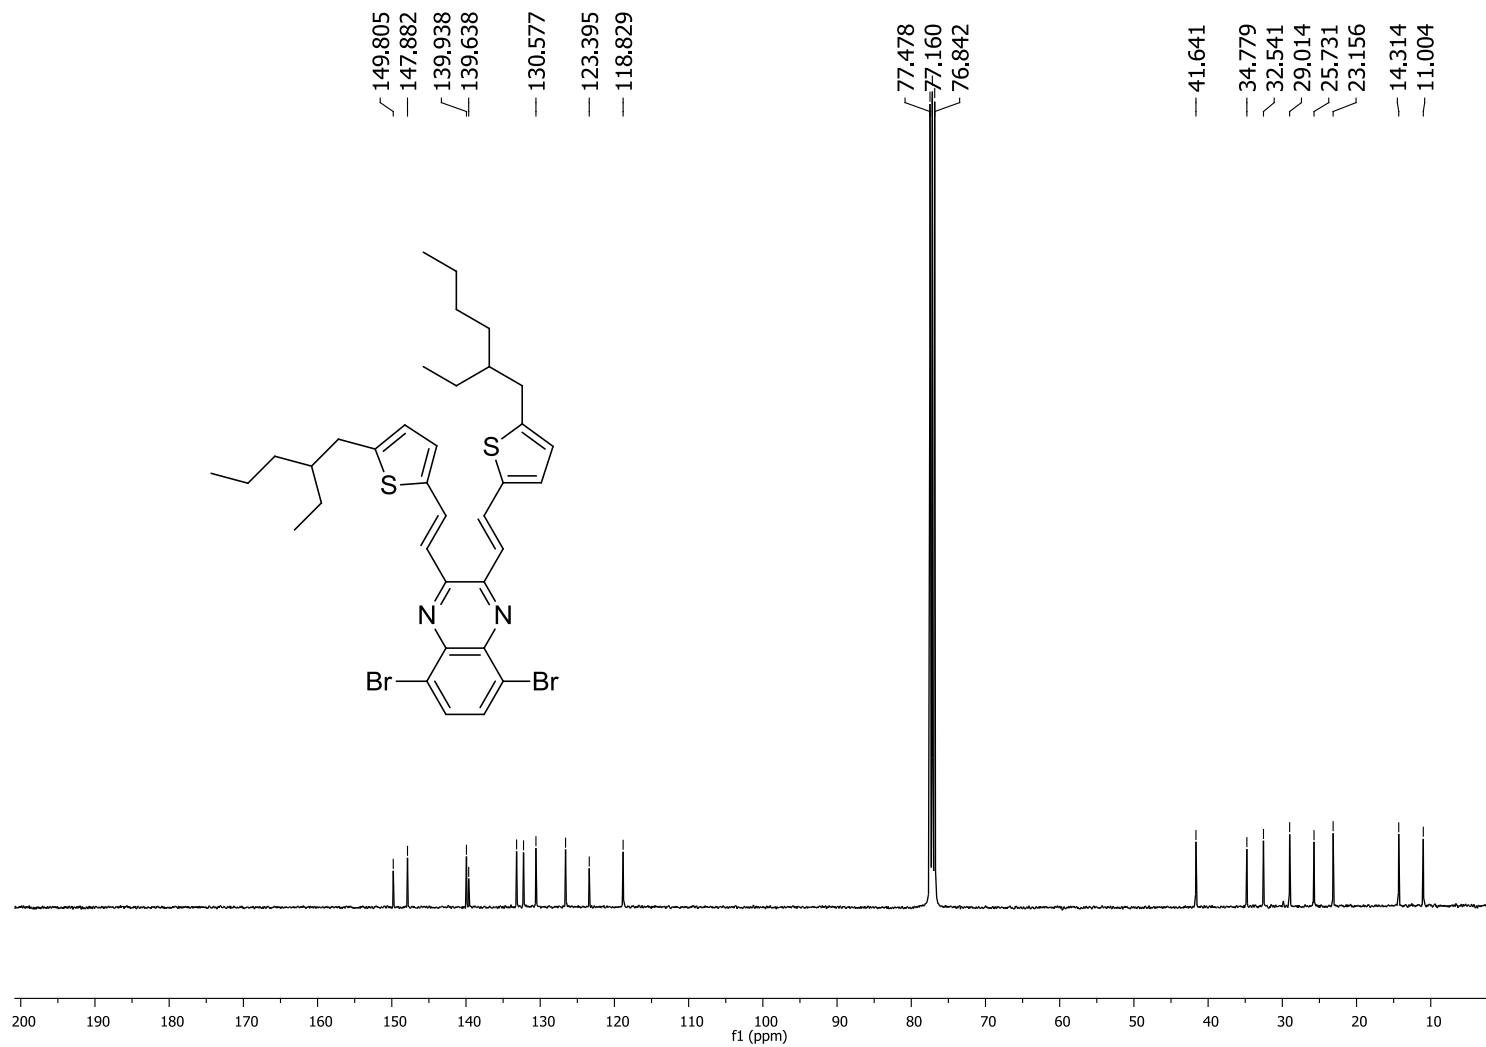

**Fig. S19.**  $^1\text{H}$  NMR spectrum (300 MHz,  $\text{CDCl}_3$ ) of **M5**

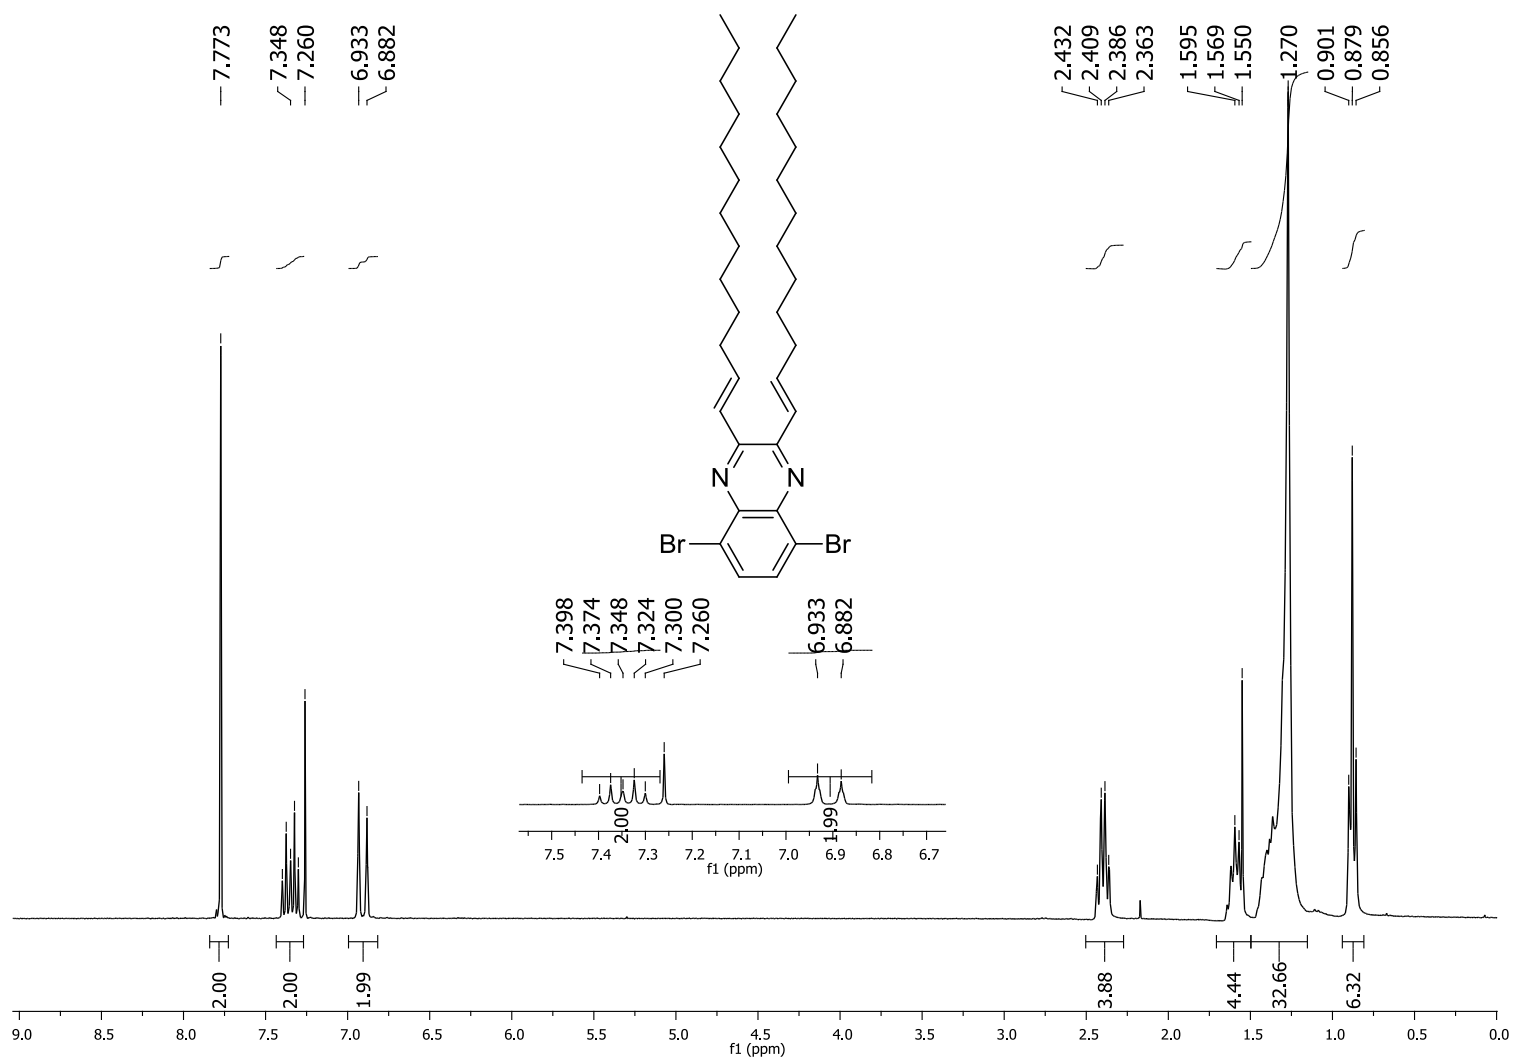

**Fig. S20.**  $^{13}\text{C}$  NMR spectrum (75 MHz,  $\text{CDCl}_3$ ) of **M5**

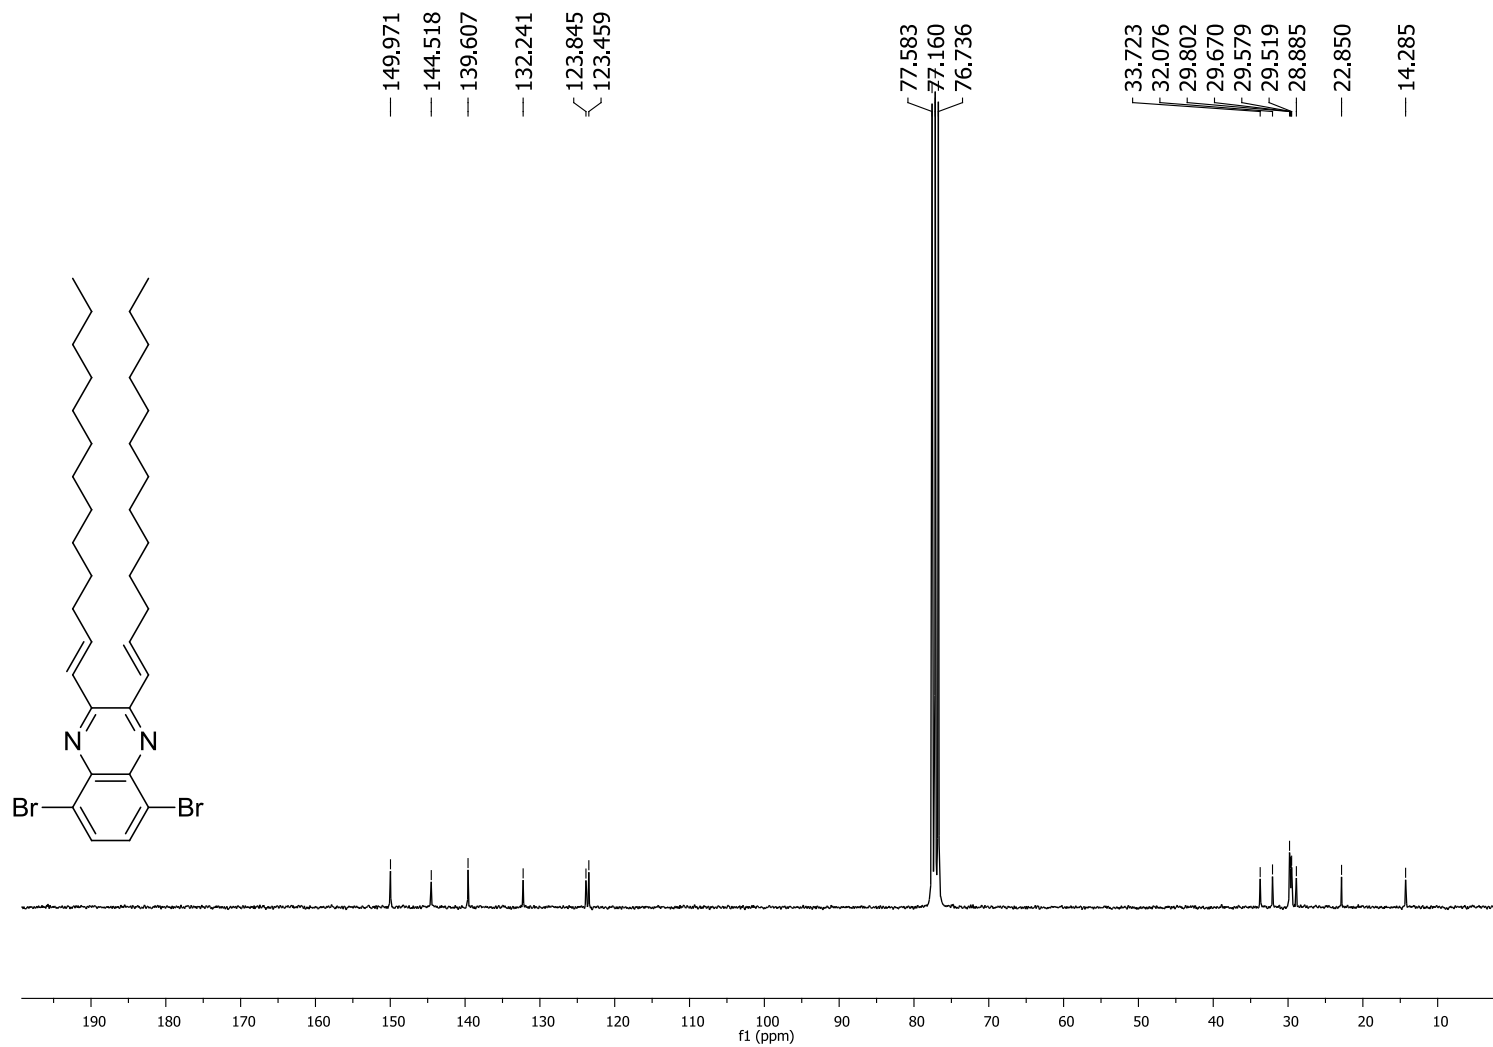

**Fig. S21.**  $^1\text{H}$  NMR spectrum (300 MHz,  $\text{CDCl}_3$ ) of **M6**

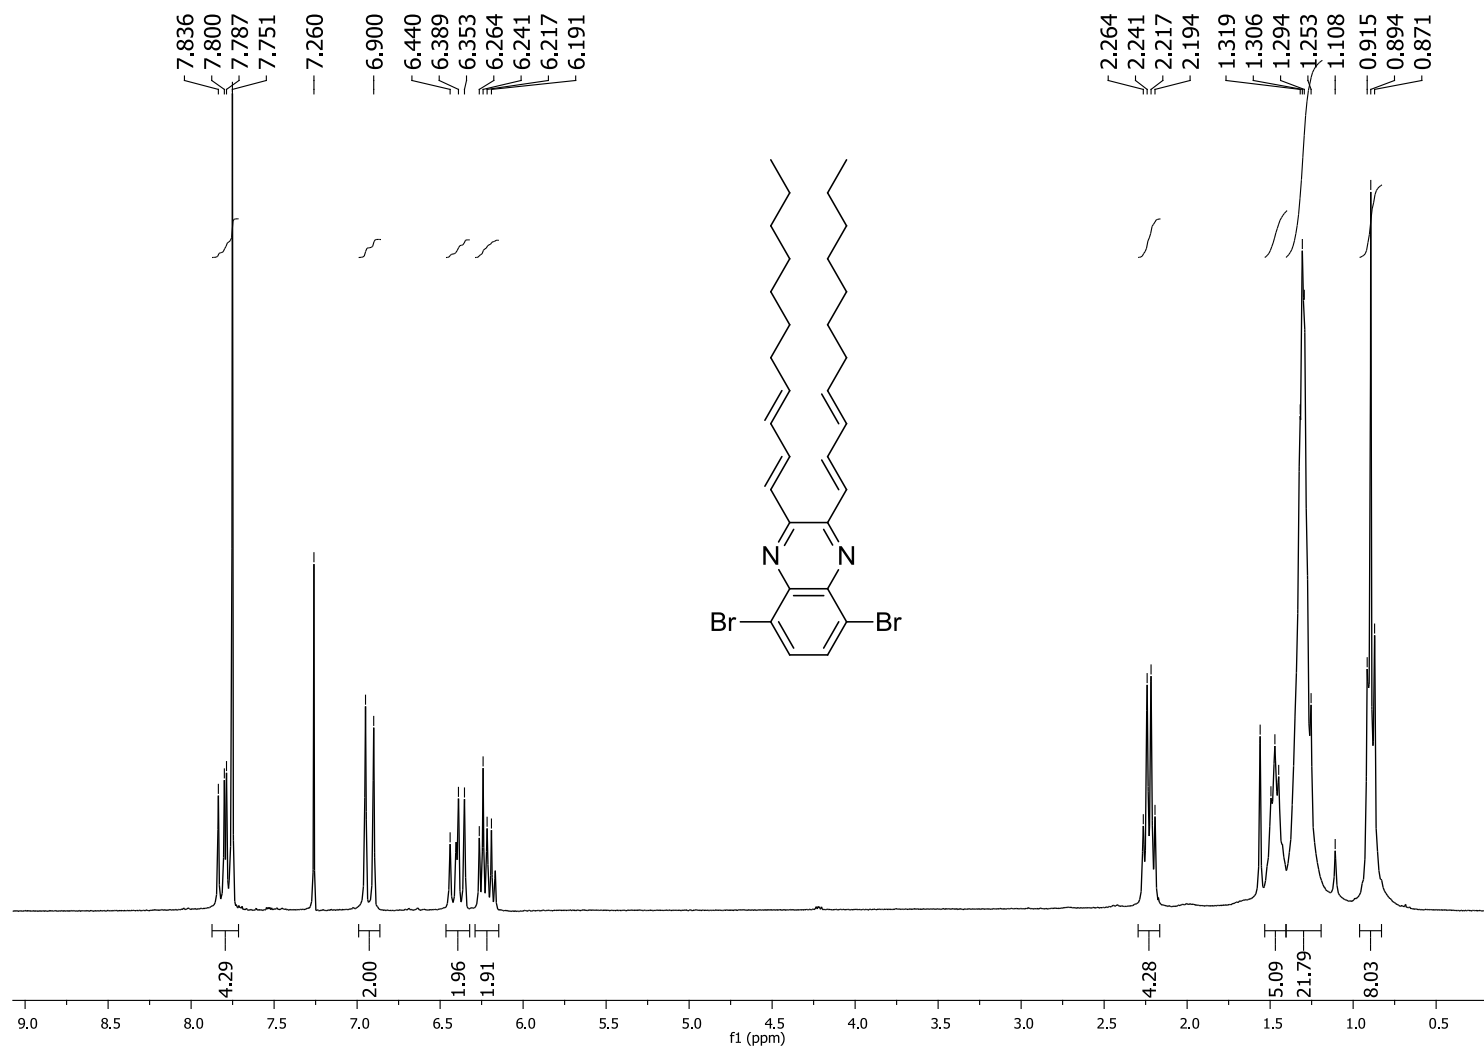

**Fig. S22.**  $^{13}\text{C}$  NMR spectrum (75 MHz,  $\text{CDCl}_3$ ) of **M6**

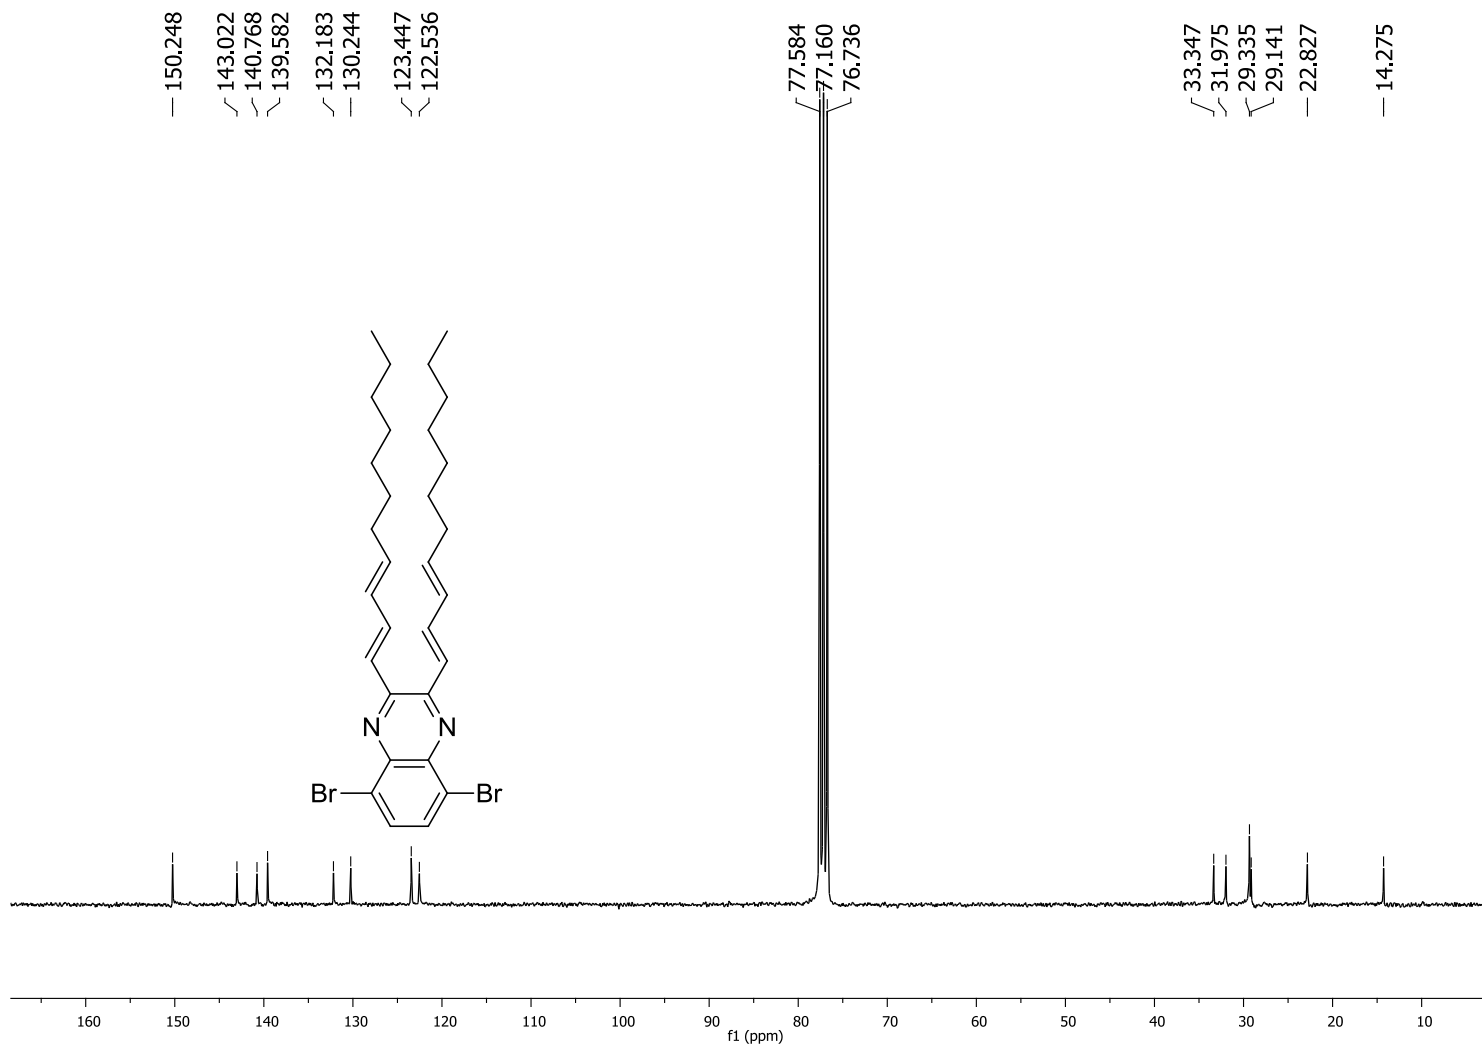



**Fig. S23.**  $^1\text{H}$  NMR spectrum (300 MHz,  $\text{CDCl}_3$ ) of **T1**

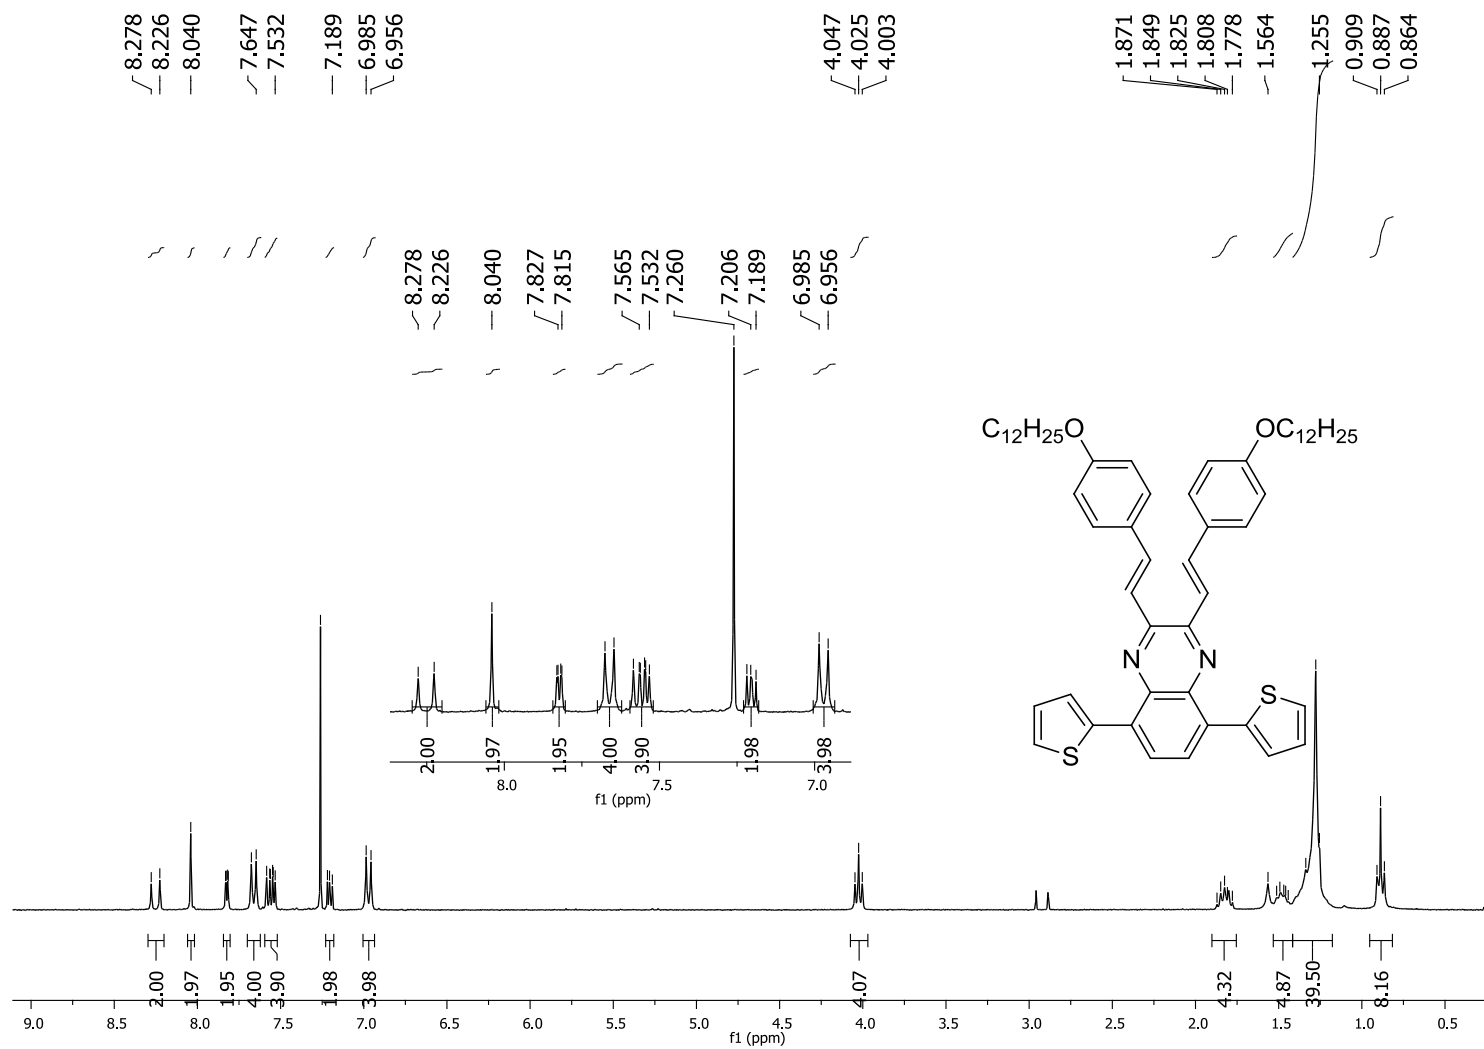

**Fig. S24.** APT spectrum (75 MHz, CDCl<sub>3</sub>) of **T1**

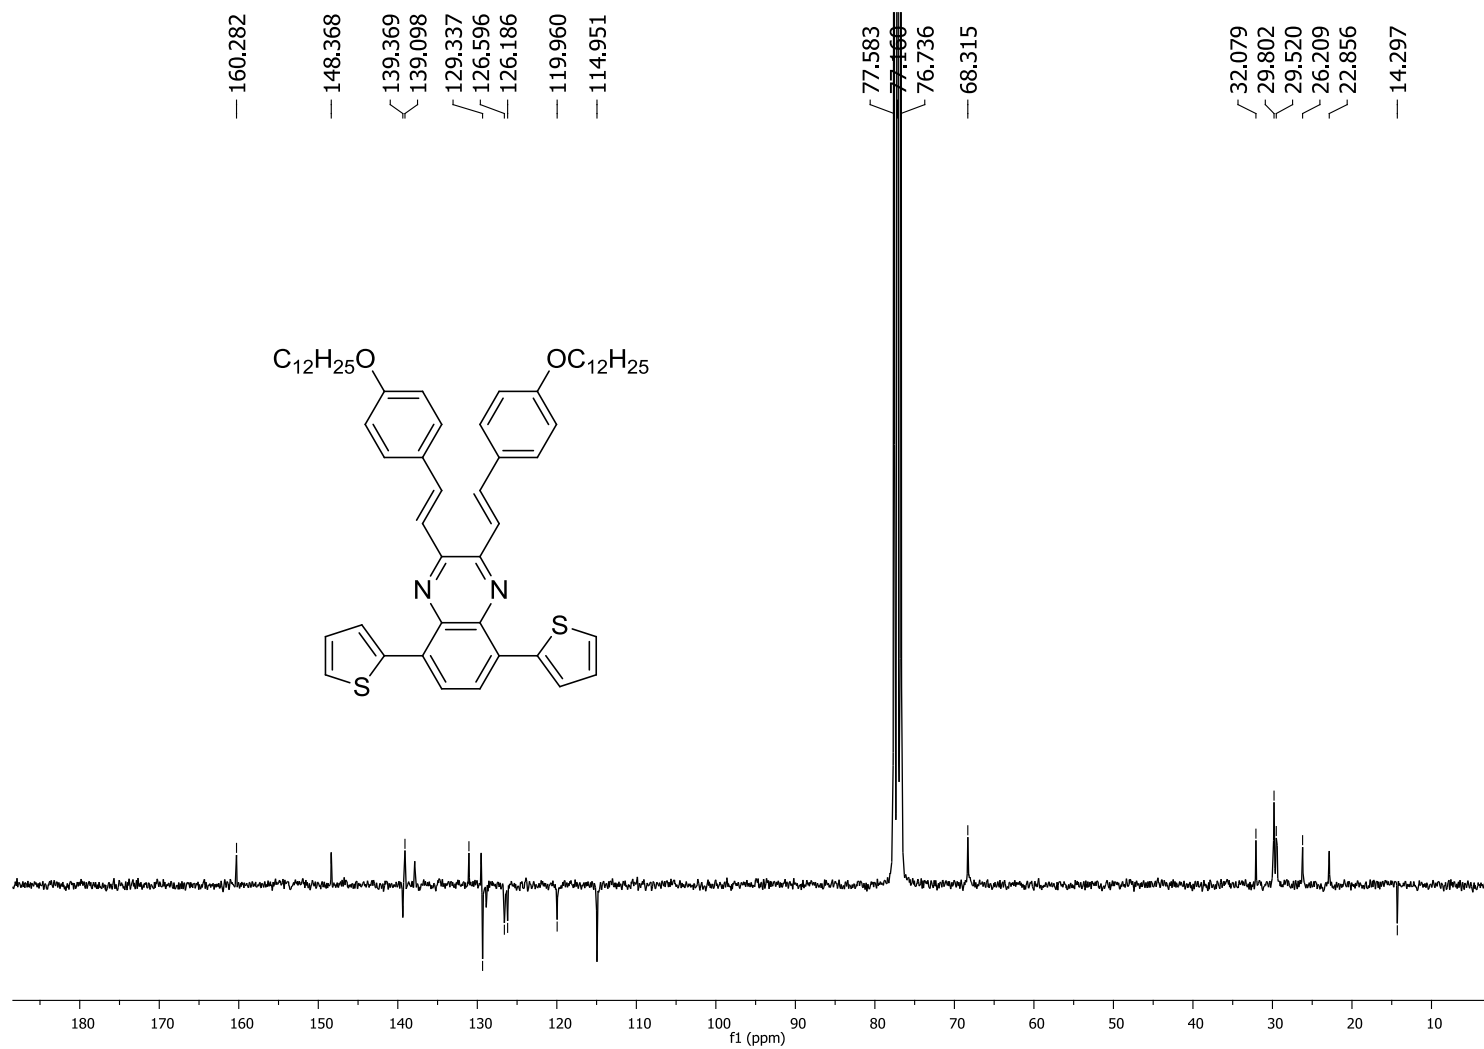

**Fig. S25.**  $^1\text{H}$  NMR spectrum (300 MHz,  $\text{CDCl}_3$ ) of **T2**

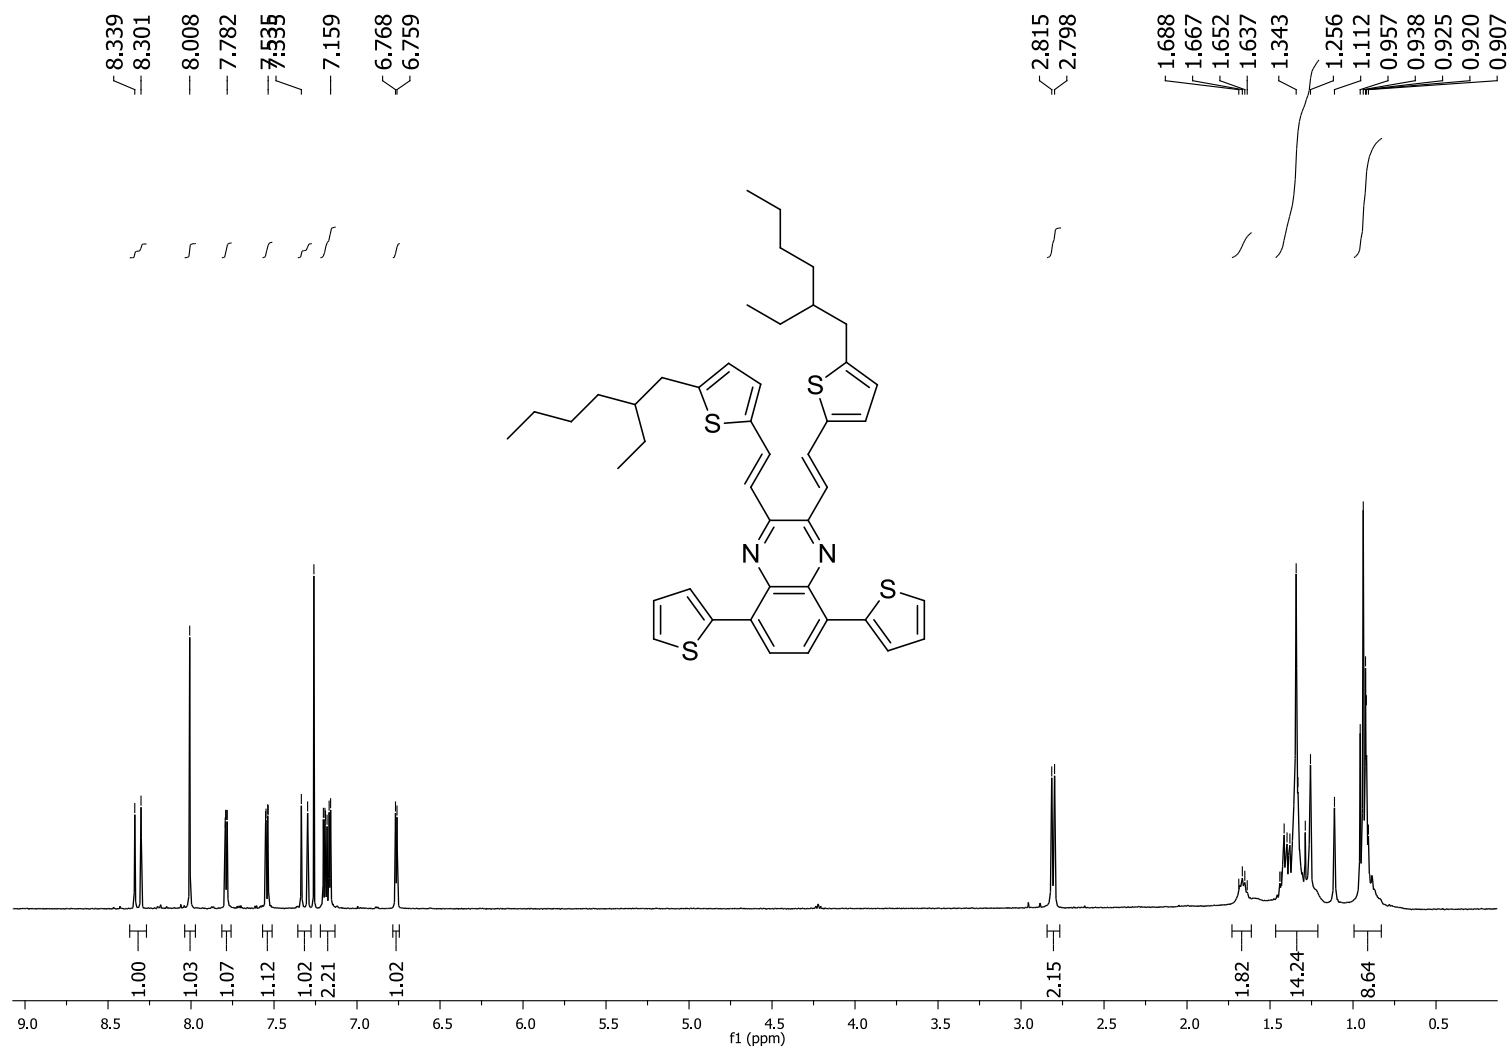

**Fig. S26.**  $^{13}\text{C}$  NMR spectrum (75 MHz,  $\text{CDCl}_3$ ) of **T2**

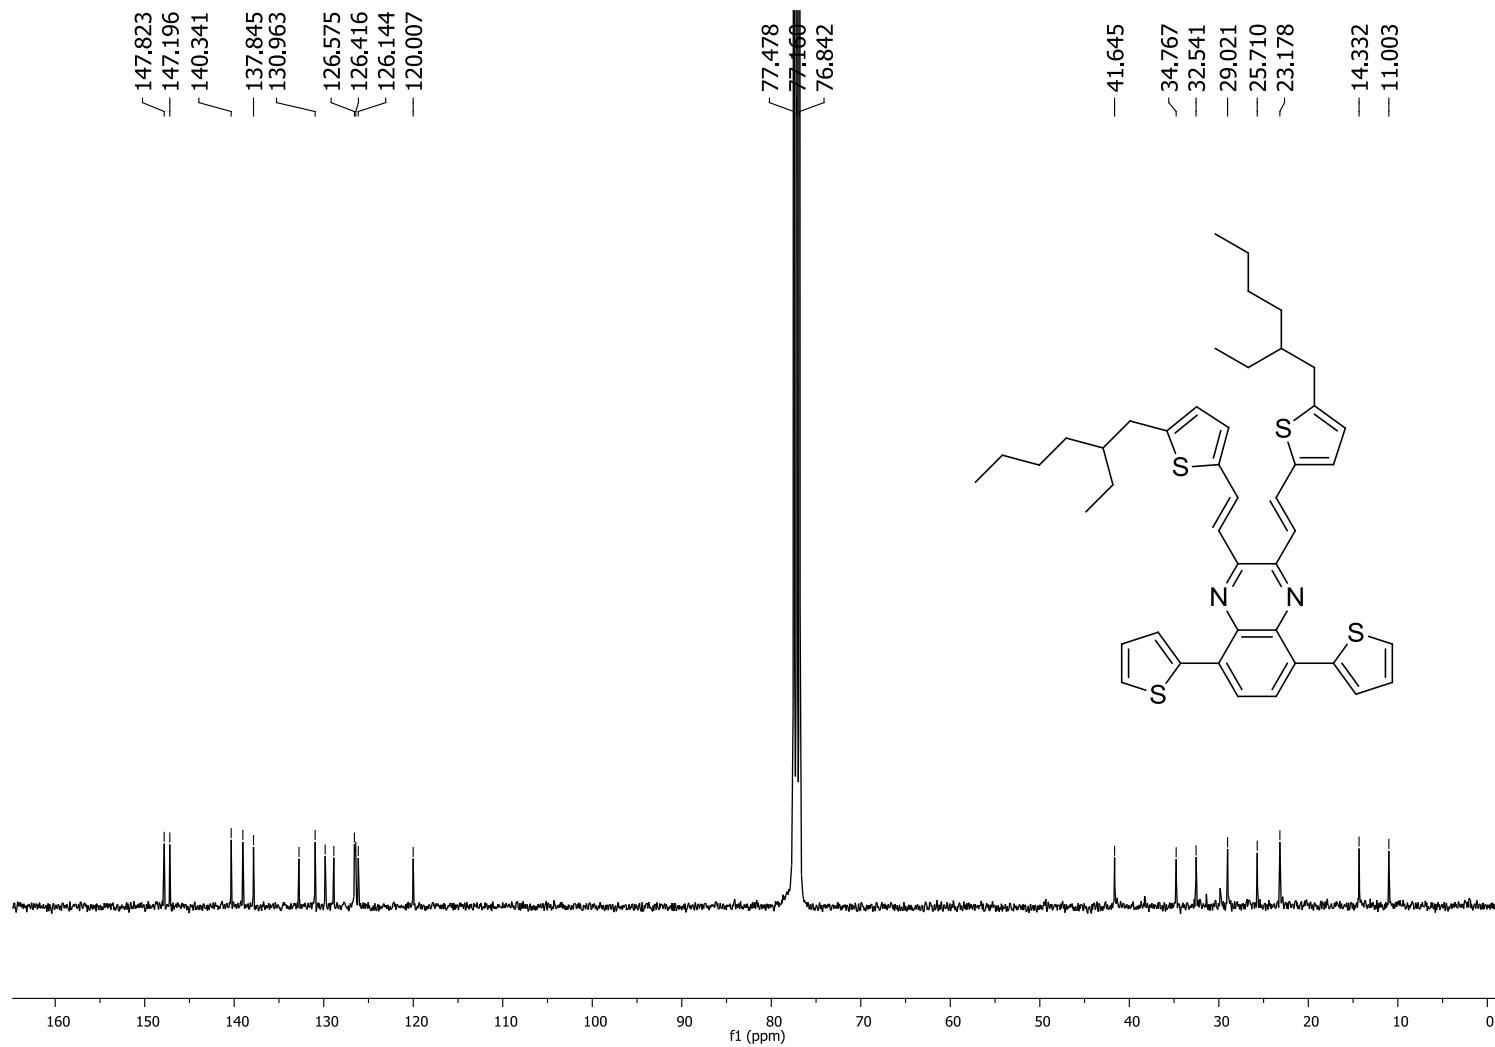

**Fig. S27.**  $^1\text{H}$  NMR spectrum (300 MHz,  $\text{CDCl}_3$ ) of **T3**

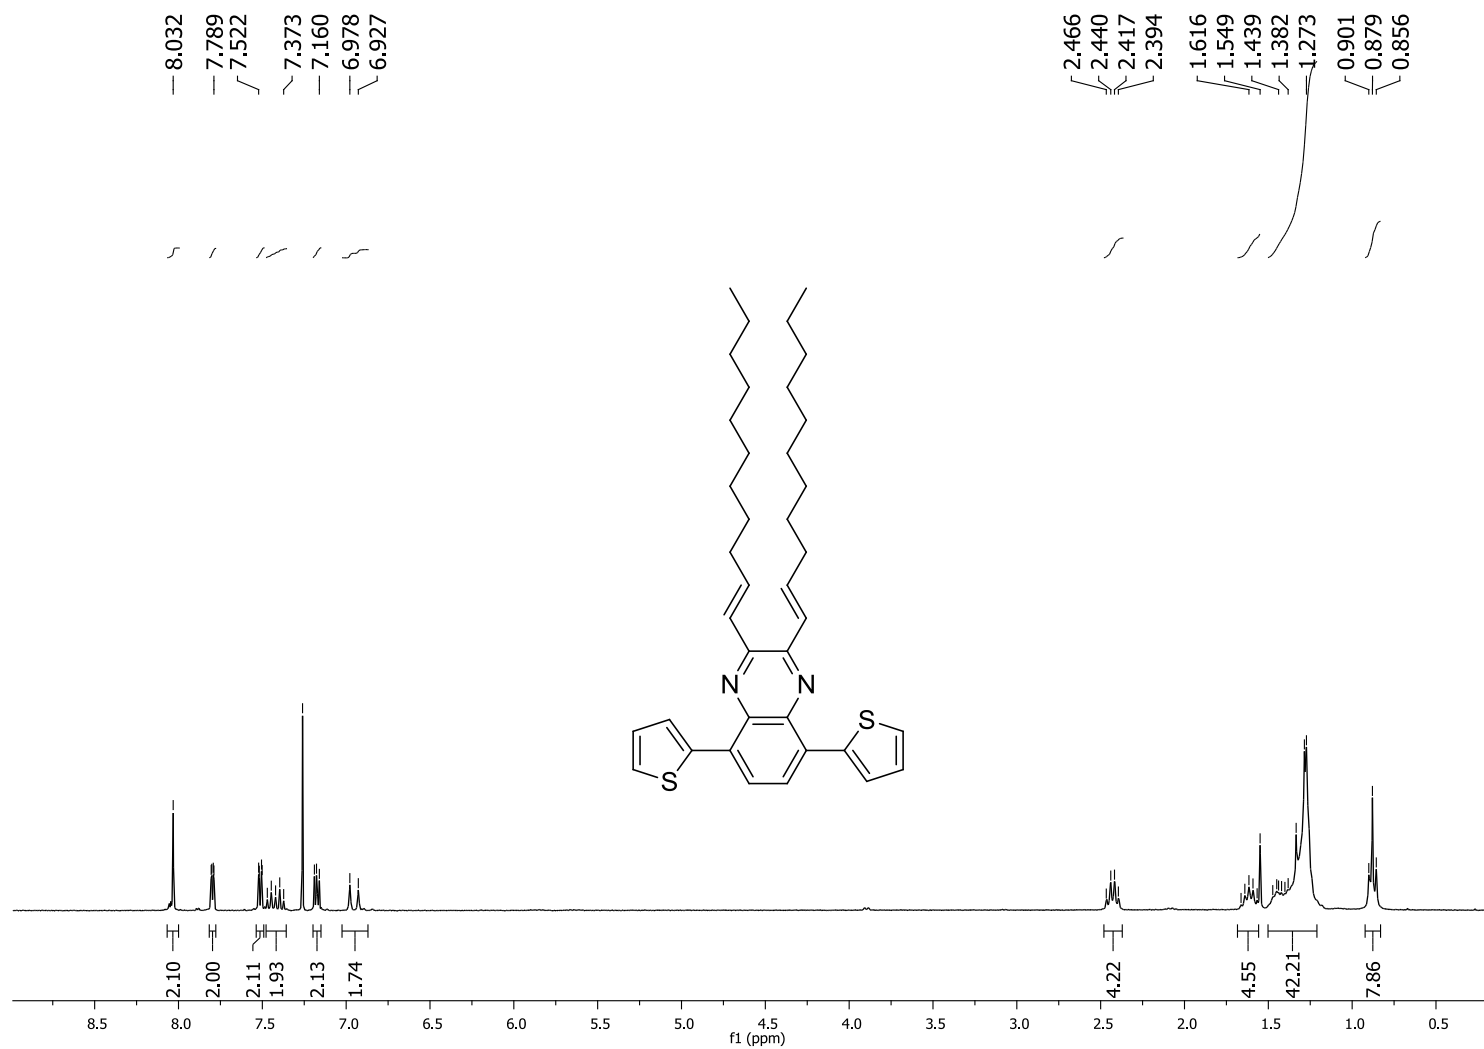

**Fig. S28.** APT spectrum (75 MHz, CDCl<sub>3</sub>) of **T3**

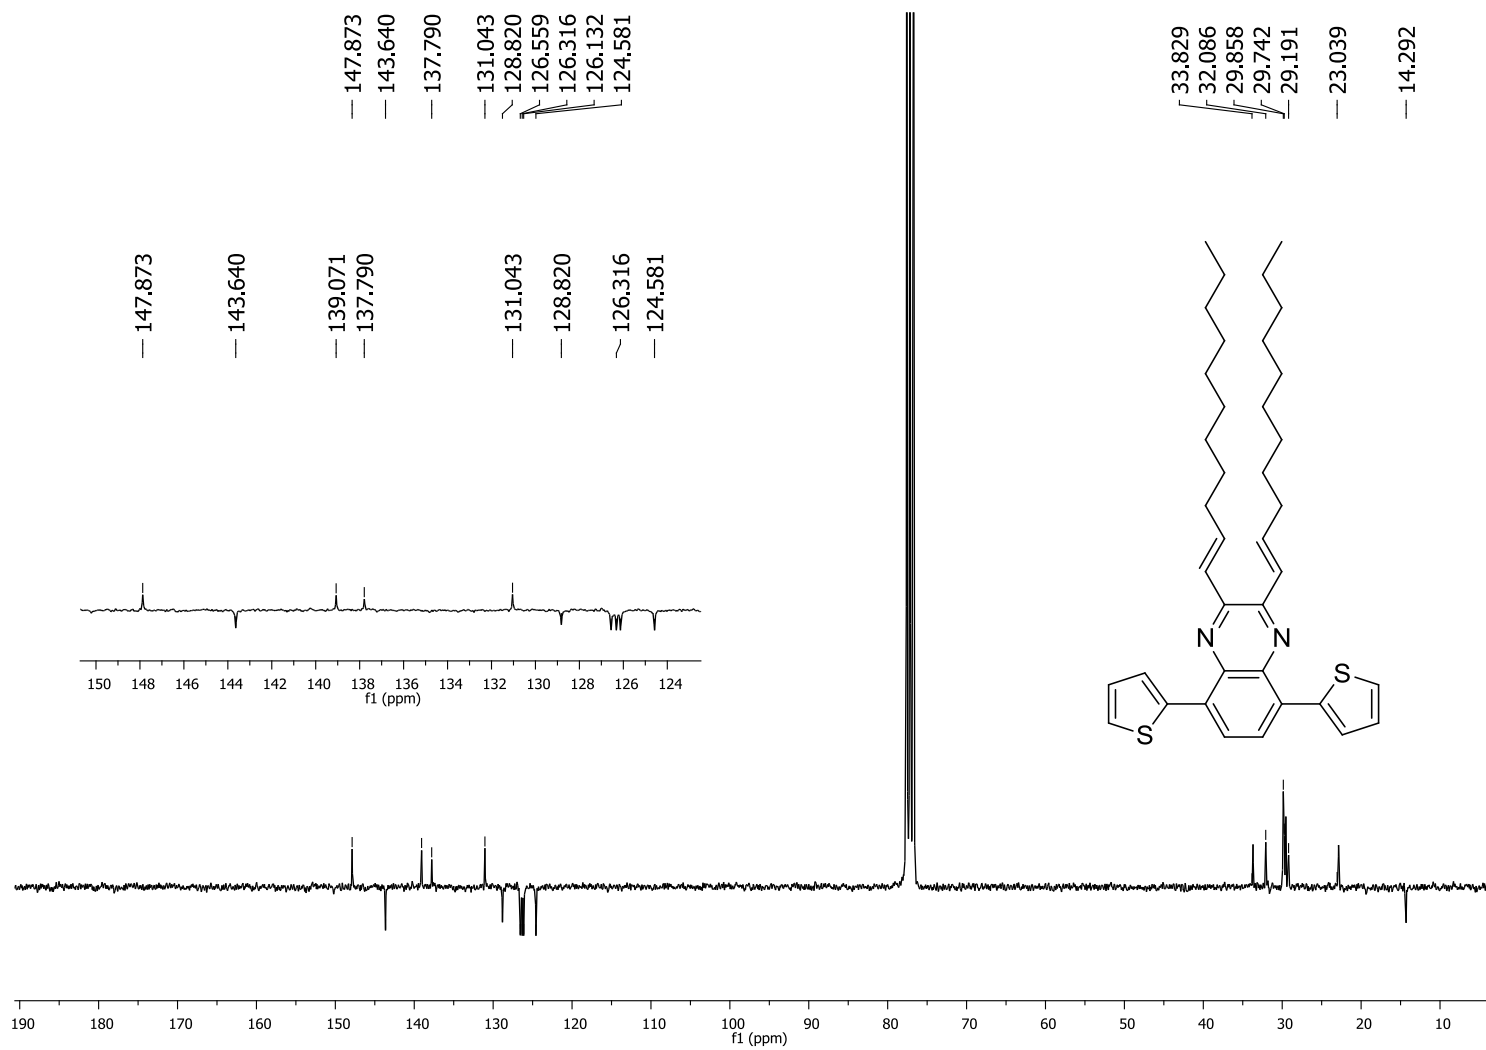

**Fig. S29.**  $^1\text{H}$  NMR spectrum (300 MHz,  $\text{CDCl}_3$ ) of **T4**

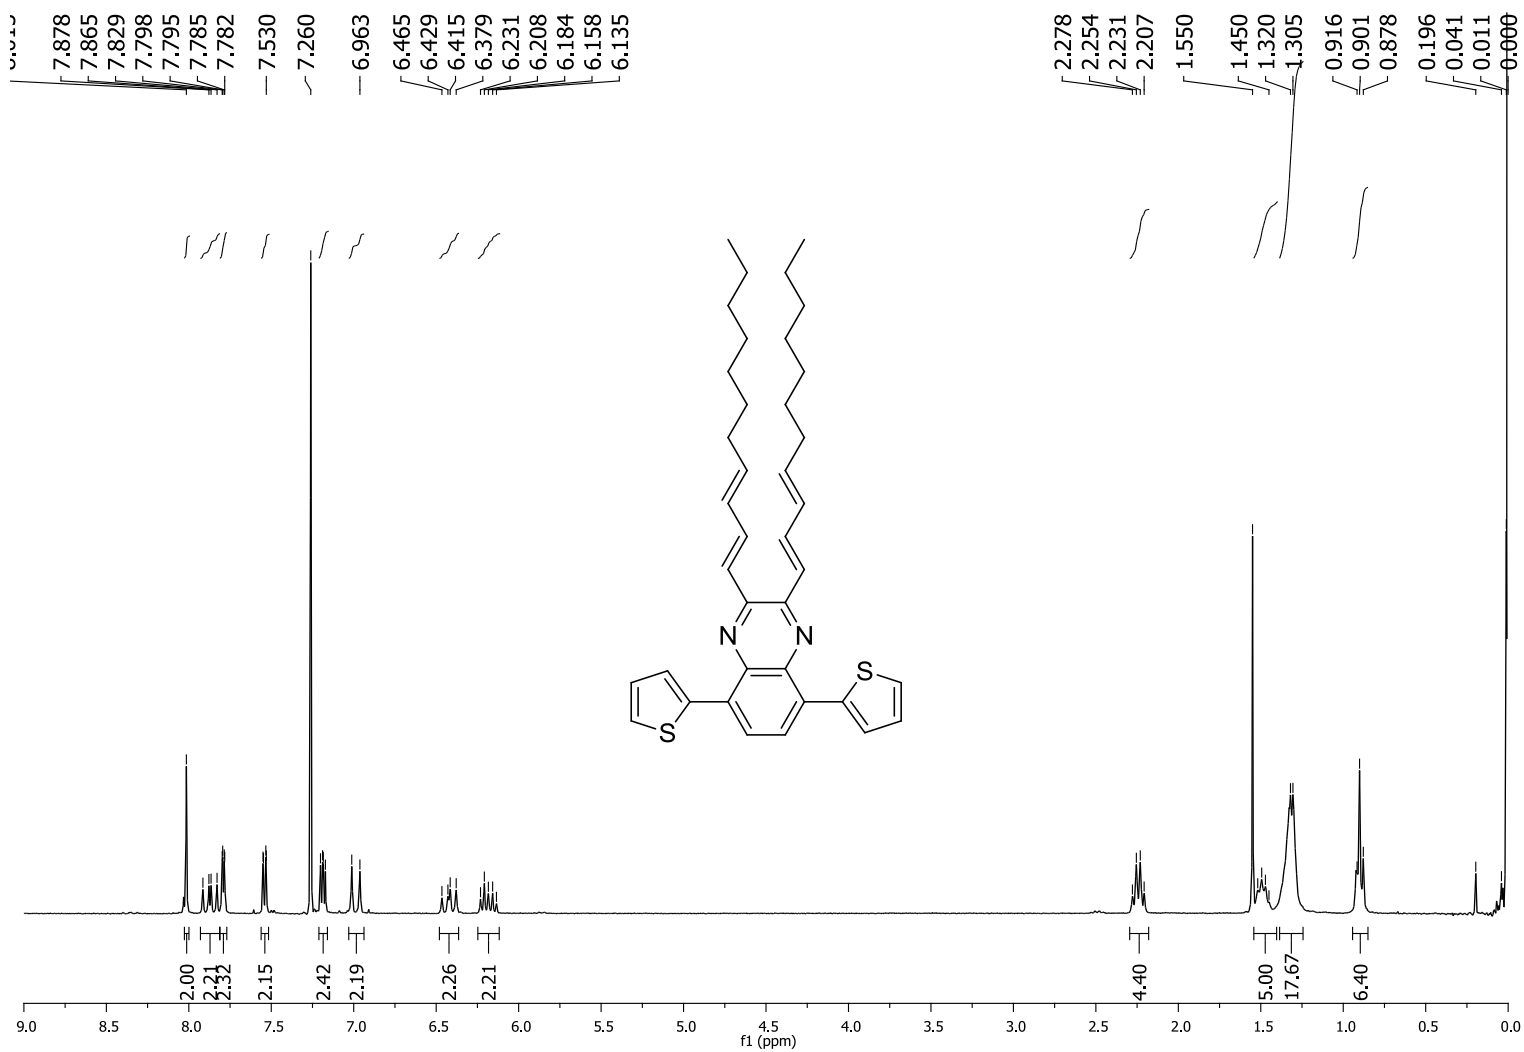

**Fig. S30.**  $^{13}\text{C}$  NMR spectrum (75 MHz,  $\text{CDCl}_3$ ) of **T4**

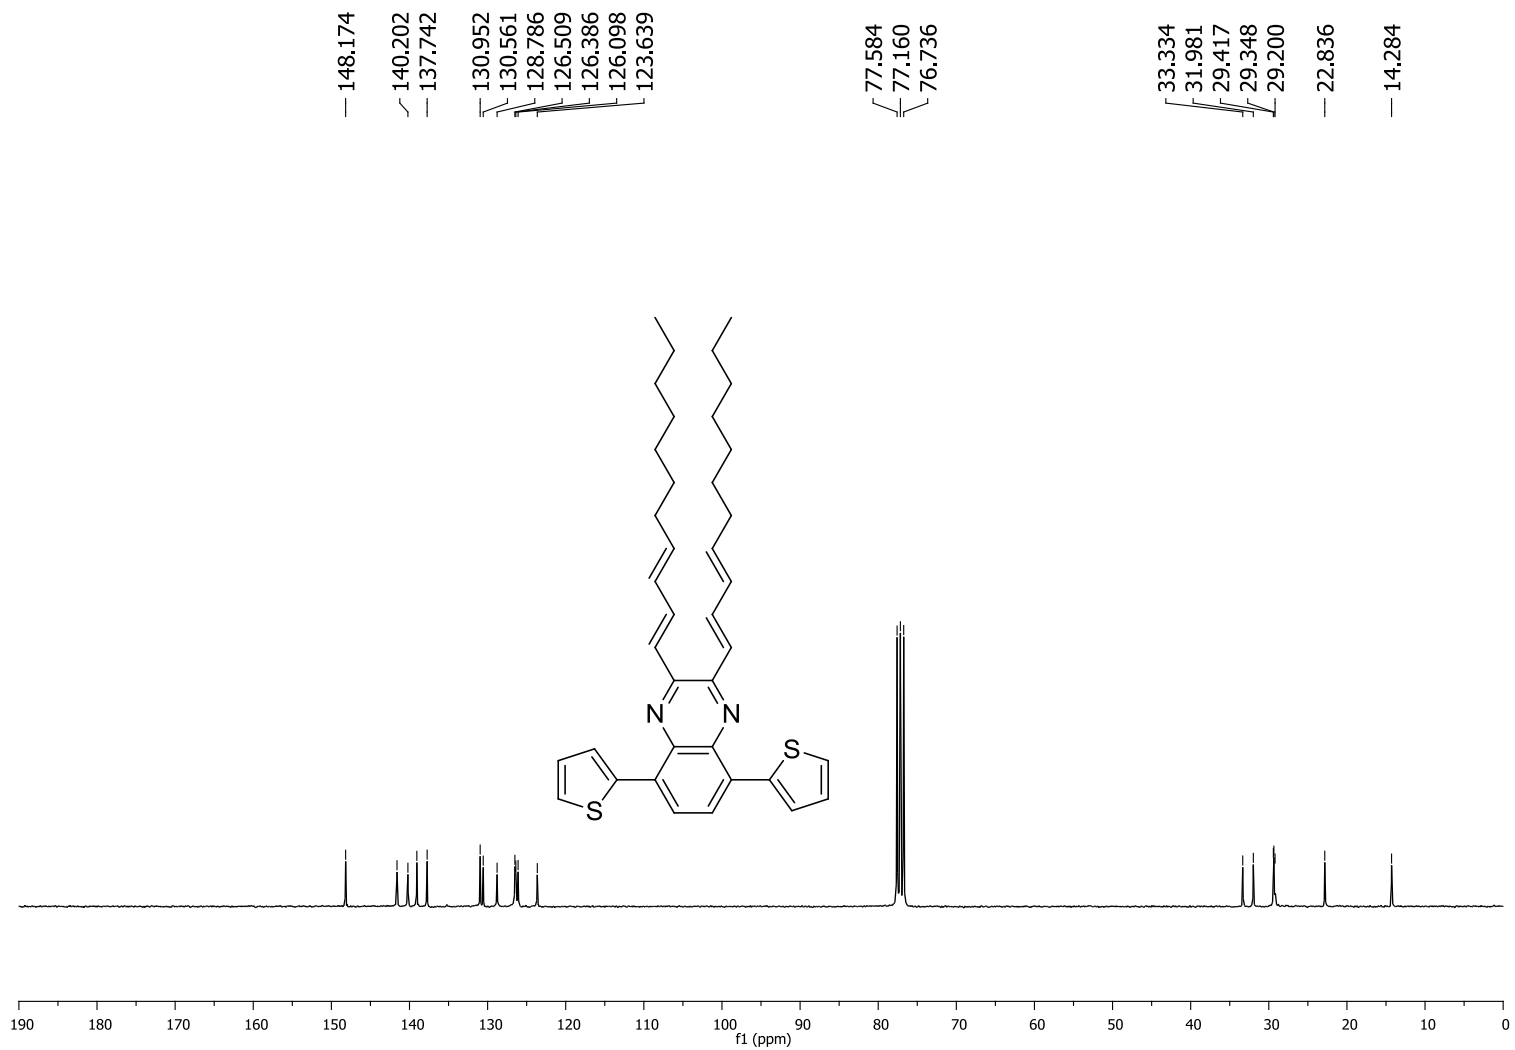



**Fig. S31.**  $^1\text{H}$  NMR spectrum (300 MHz,  $\text{CDCl}_3$ ) of **7**

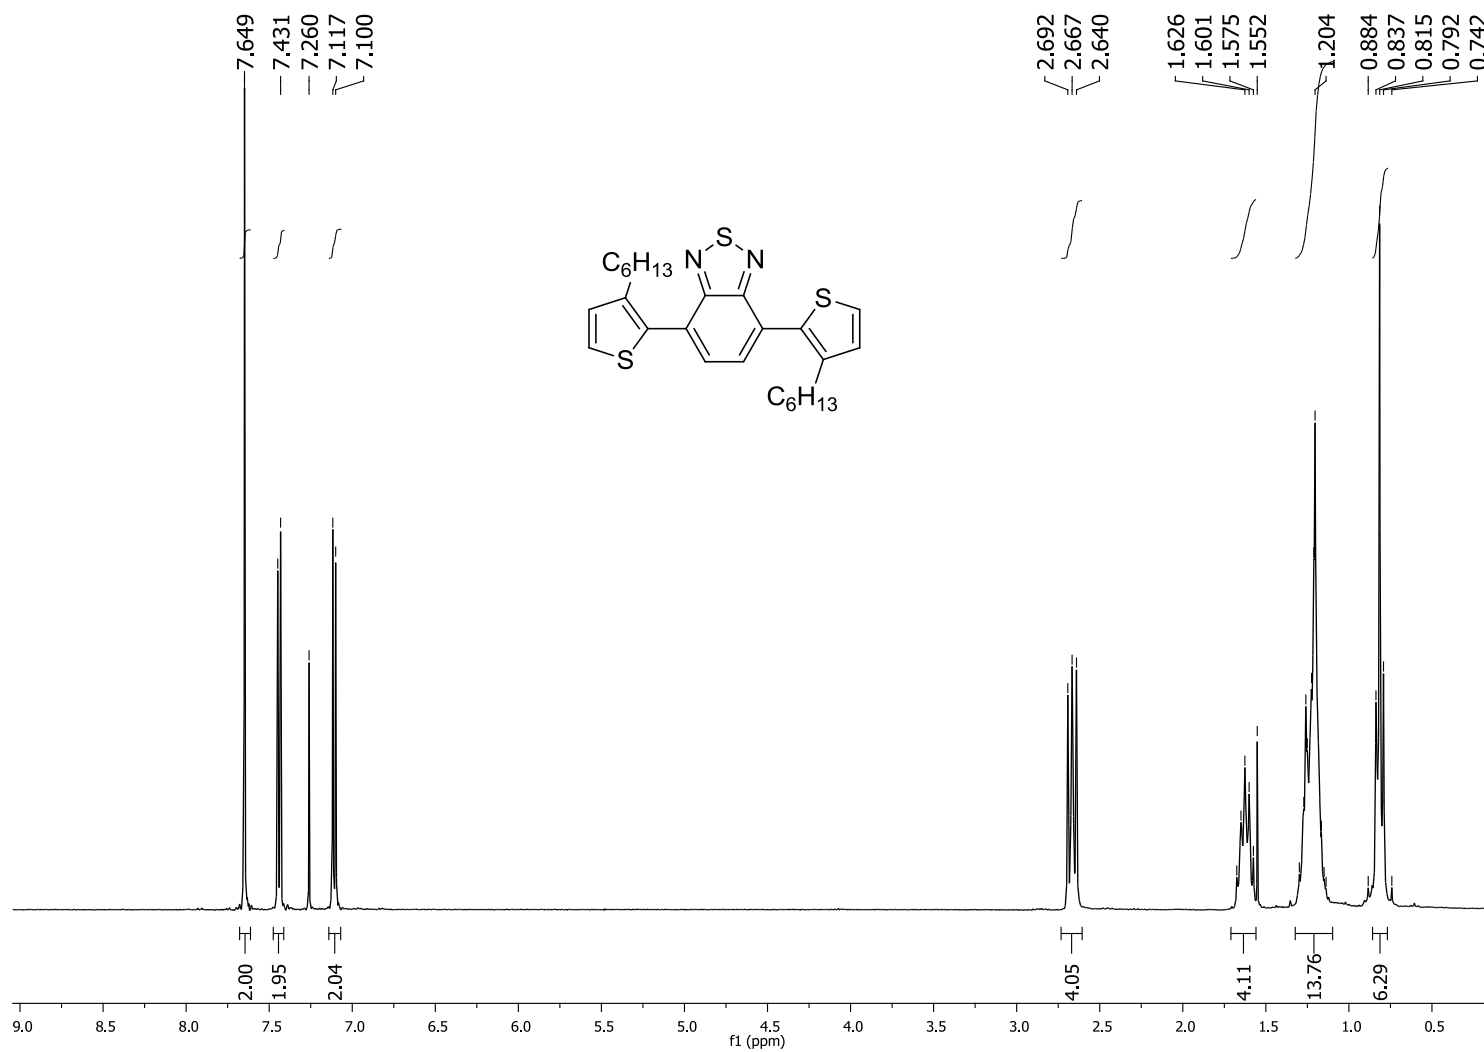

**Fig. S32.**  $^{13}\text{C}$  NMR spectrum (75 MHz,  $\text{CDCl}_3$ ) of **7**

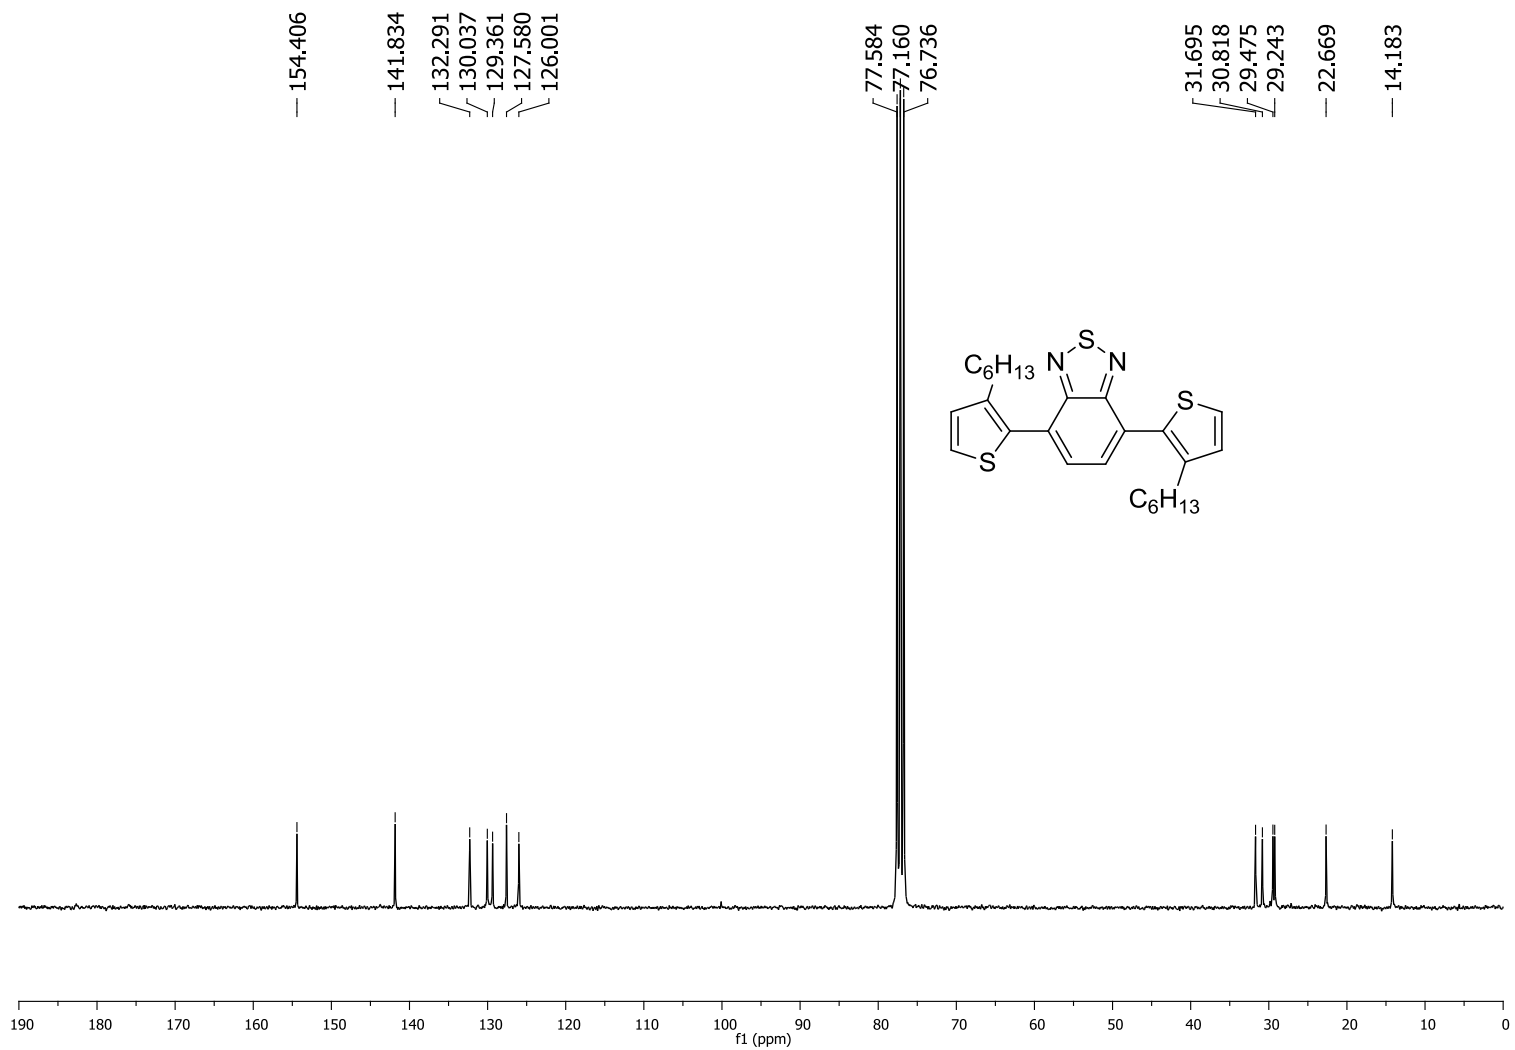

**Fig. S33.**  $^1\text{H}$  NMR spectrum (300 MHz,  $\text{CDCl}_3$ ) of **8**

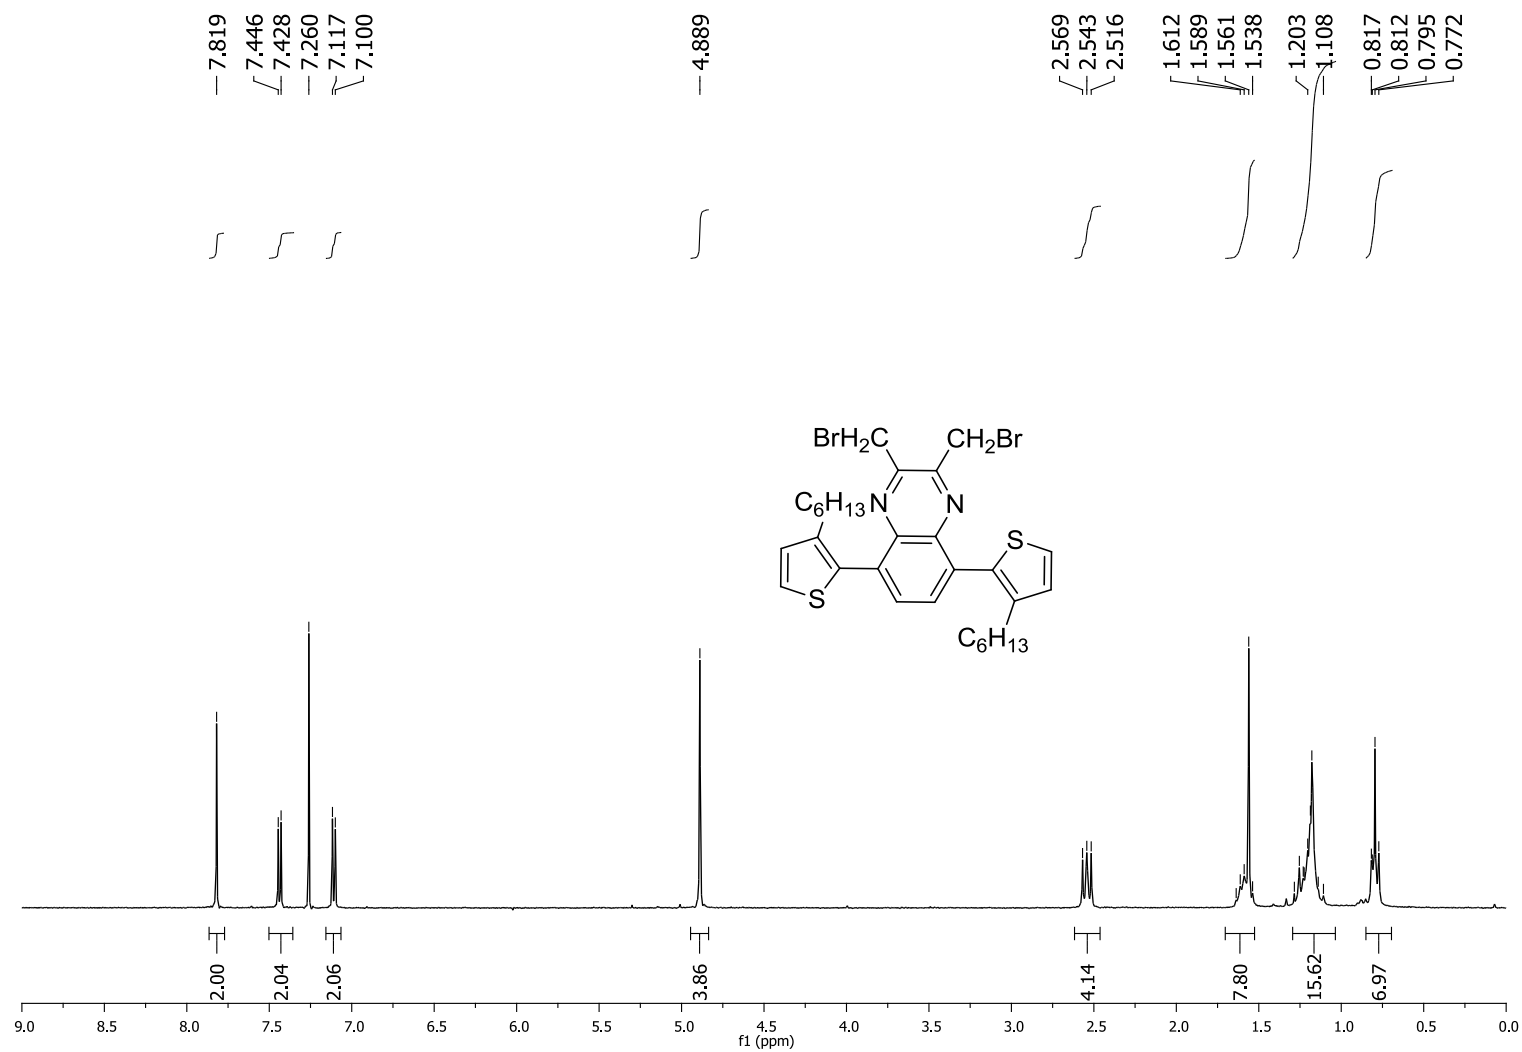

**Fig. S34.**  $^{13}\text{C}$  NMR spectrum (75 MHz,  $\text{CDCl}_3$ ) of **8**

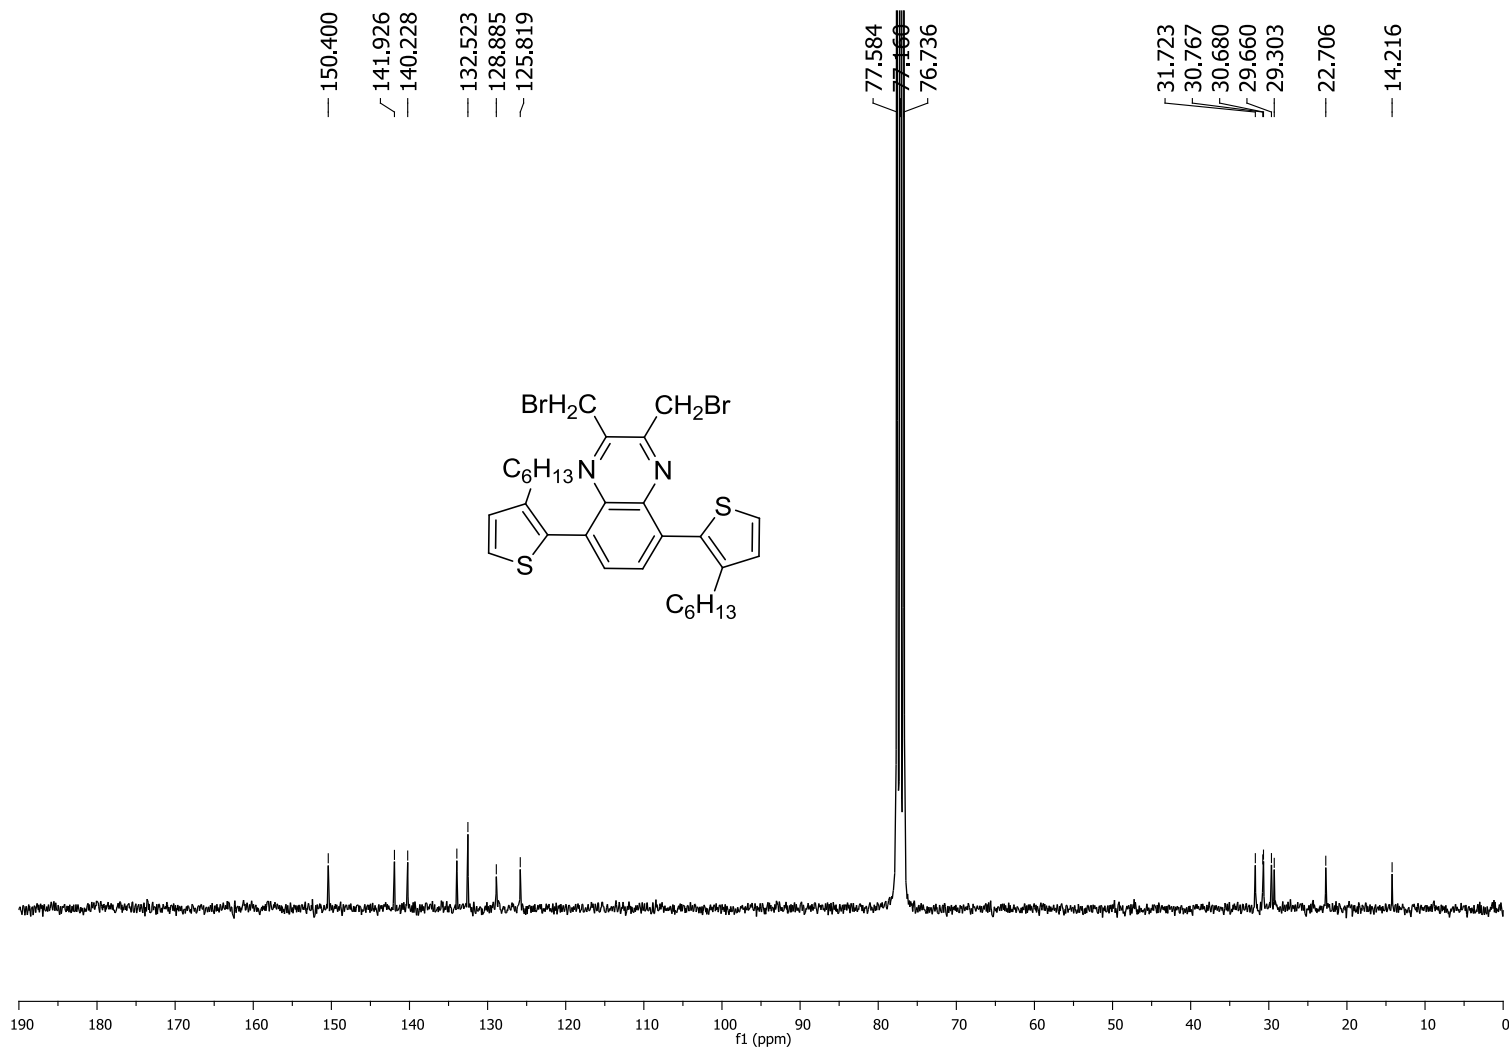

**Fig. S35.**  $^1\text{H}$  NMR spectrum (300 MHz,  $\text{CDCl}_3$ ) of **9**

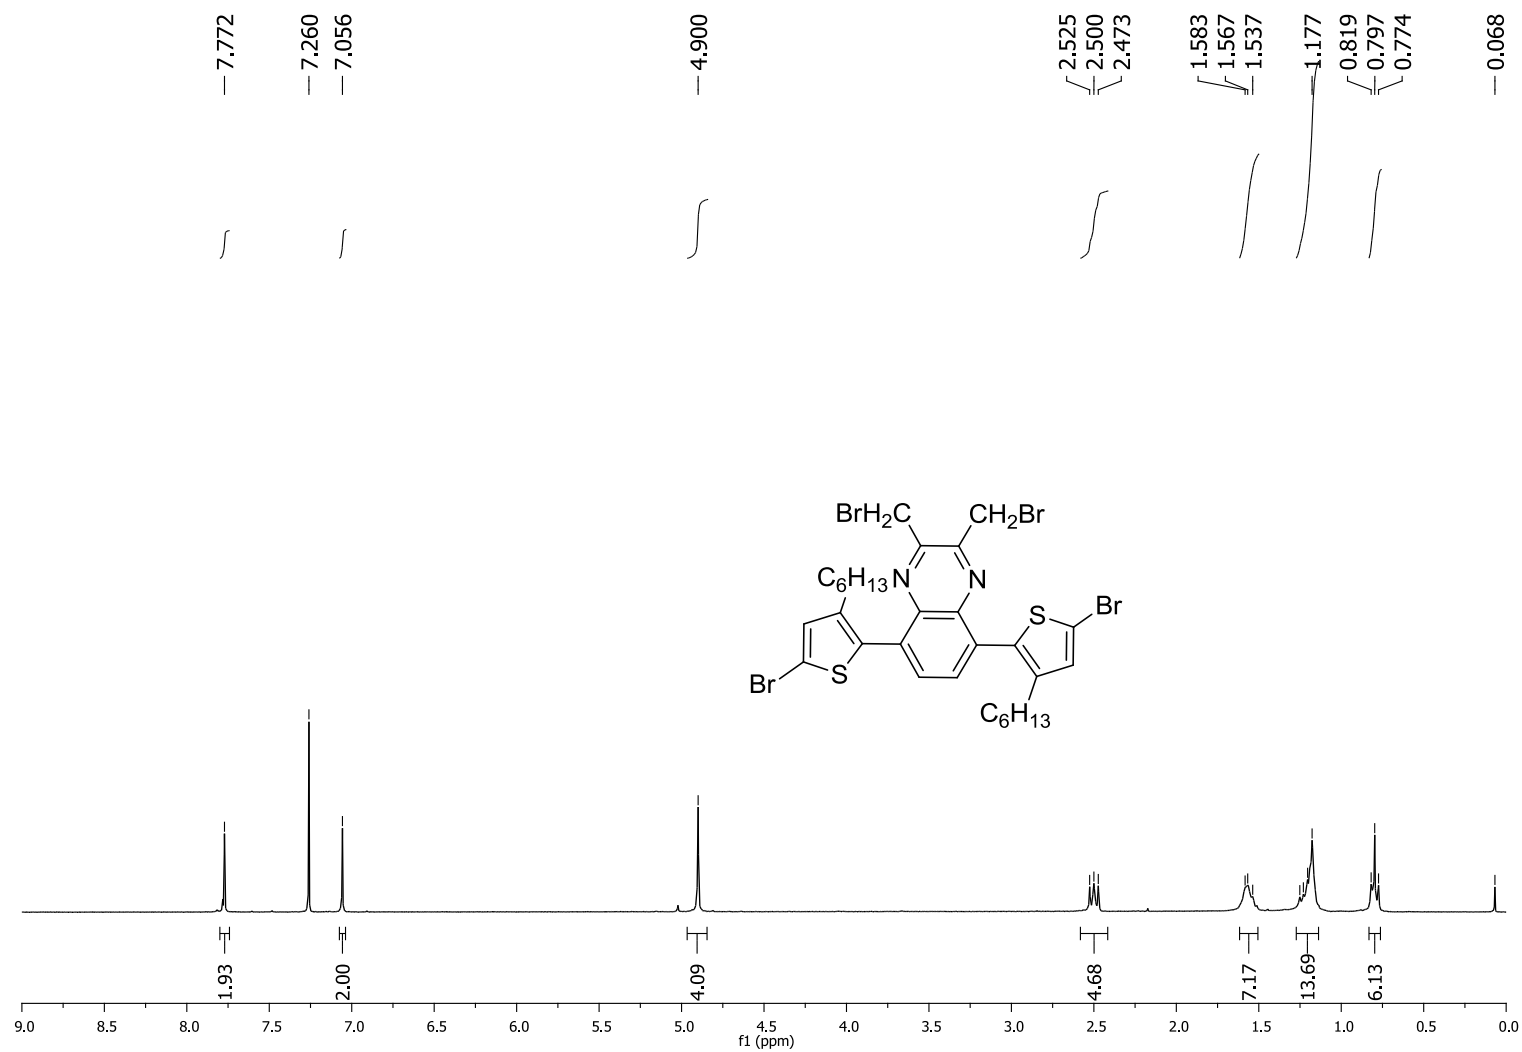

**Fig. S36.**  $^{13}\text{C}$  NMR spectrum (75 MHz,  $\text{CDCl}_3$ ) of **9**

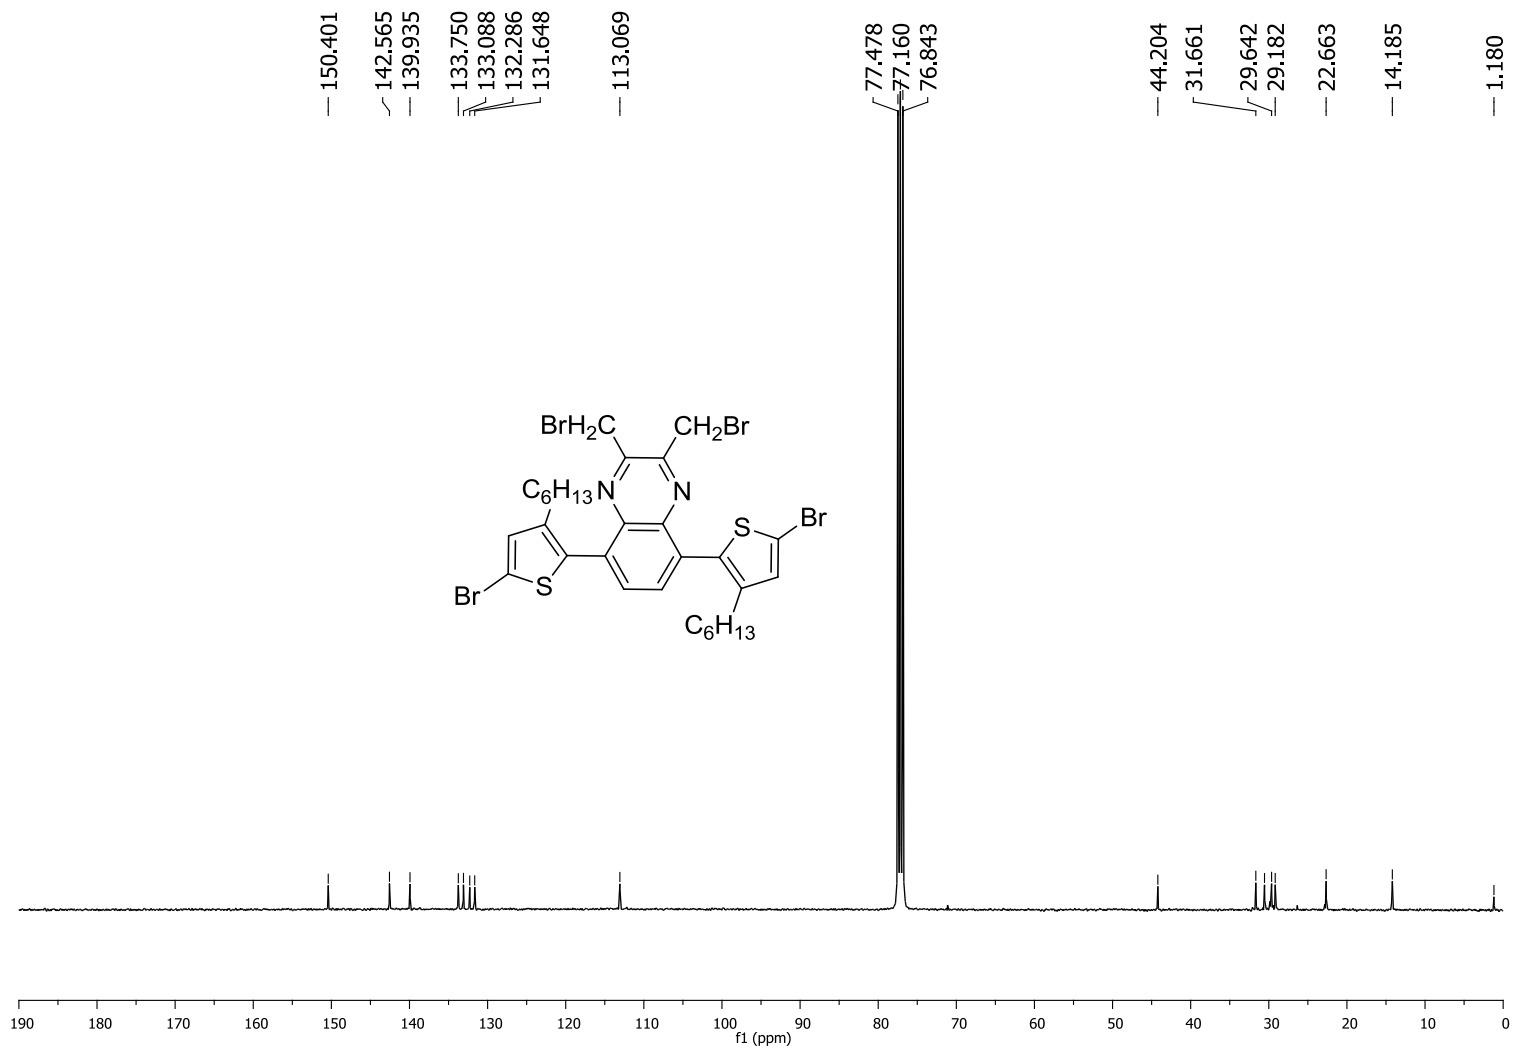

**Fig. S37.**  $^1\text{H}$  NMR spectrum (300 MHz,  $\text{CDCl}_3$ ) of **T5**

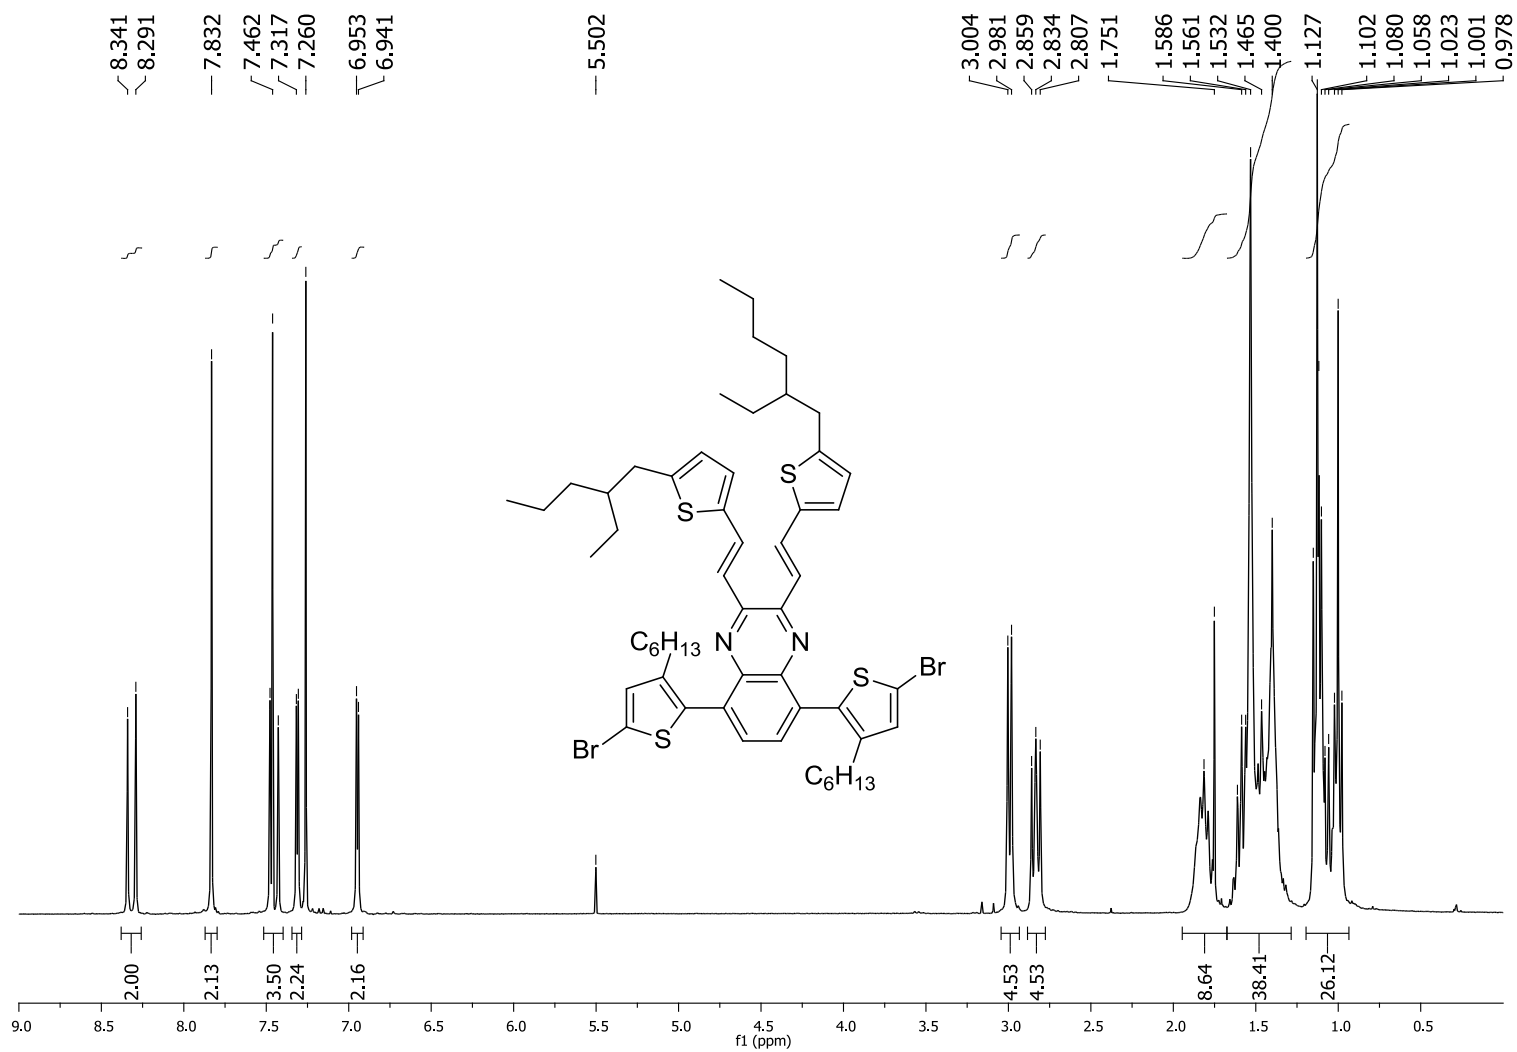

**Fig. S38.** APT spectrum (75 MHz, CDCl<sub>3</sub>) of **T5**

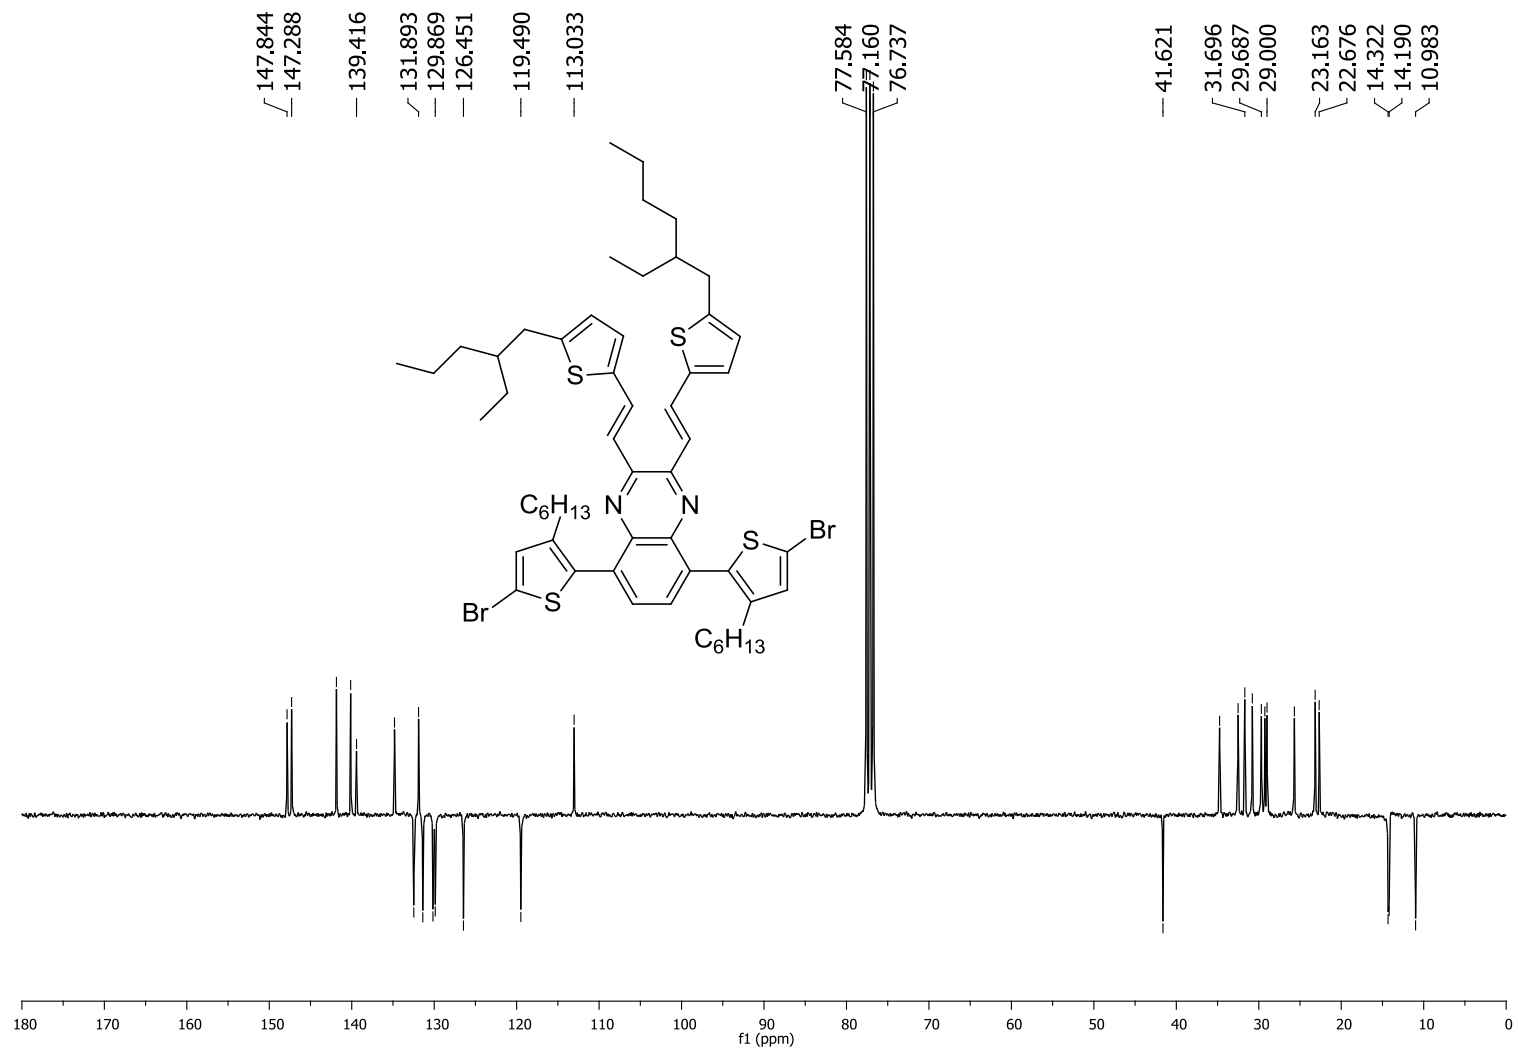



**Table S1** UV-Vis and PL data of all quinoxaline derivatives (**Q1–Q4**), monomers (**M1–M6**) and triads (**T1–T5**)

| Product   | $\lambda_{\text{max}}$ (log $\epsilon$ )           | $\lambda_{\text{max}}$ (nm) | Onset (nm) | $E_g$ (opt) (eV) | $\lambda_{\text{max}}$ (nm) | Side chain           |
|-----------|----------------------------------------------------|-----------------------------|------------|------------------|-----------------------------|----------------------|
|           | UV-vis (CHCl <sub>3</sub> , nm)                    | (film)                      |            |                  | PL (CHCl <sub>3</sub> , nm) |                      |
| <b>Q1</b> | 268 (4.554)/ 333 (3.753)                           | 224/280/349                 | 426        | 2.91             | <sup>a</sup>                | CH <sub>2</sub> Br   |
| <b>Q2</b> | 254 (4.402)/ 285 (4.348)/ 358 (4.085)              | 260/277/363                 | 410        | 3.02             | <sup>a</sup>                | Ph                   |
| <b>Q3</b> | 262 (4.238)/ 316 (4.355)/ 401 (4.085)              | 328/419                     | 472        | 2.63             | 461                         | Th                   |
| <b>Q4</b> | 270 (4.068)/ 324 (4.314)/ 420 (4.100)              | 240/321/410                 | 477        | 2.60             | 472                         | 2EH-Th               |
| <b>M1</b> | 292 (4.382)/ 341 (4.857)/ 431 (4.528)              | 220/257/350                 |            |                  | 495                         | Th*                  |
| <b>M2</b> | 290 (4.300)/ 336 (4.661)/ 428 (4.331)              | 343/443                     | 544        | 2.28             | 501                         | MeO-Ph*              |
| <b>M3</b> | 292 (4.271)/ 338 (4.636)/ 431 (4.315)              | 224/345/451                 | 512        | 2.42             | 383/498                     | C <sub>12</sub> OPh* |
| <b>M4</b> | 296 (3.782)/ 345 (4.091)/ 415 (3.949)/ 448 (3.867) | 298/351/456                 | 530        | 2.34             | 475                         | 2EH-Th*              |
| <b>M5</b> | 284 (4.280)/ 376 (3.780)                           | 238/283/370                 | 430        | 2.88             | 414                         | C <sub>11</sub> *    |
| <b>M6</b> | 319 (4.065)/ 408 (3.363)                           | 223/316/407                 | 487        | 2.55             | 463                         | C <sub>7</sub> **    |
| <b>T1</b> | 363 (4.304)/ 442 (3.931)                           | 314/368/460                 | 575        | 2.16             | 578                         | C <sub>12</sub> OPh* |
| <b>T2</b> | 310 (3.957)/ 380 (4.000)/ 454 (3.708)              | 325/390/478                 | 596        | 2.08             | 580                         | 2EH-Th*              |
| <b>T3</b> | 311 (4.463)/ 410 (3.902)                           | 264/322/427                 | 606        | 2.05             | 552                         | C <sub>11</sub> *    |
| <b>T4</b> | 309 (4.384)/ 433 (3.622)                           | 309/453                     | 604        | 2.05             | 568                         | C <sub>7</sub> **    |
| <b>T5</b> | 290 (4.541)/ 364 (4.357)                           | 296/383/457                 | 554        | 2.24             | 553                         | 2EH-Th*              |

<sup>a</sup> Not measured; \* Ethenyl linker; \*\* Butadienyl linker.

**Fig. S39.** UV-Vis absorption spectra (in film) of all quinoxaline derivatives (**Q1–Q4**), monomers (**M1–M6**) and triads (**T1–T5**)

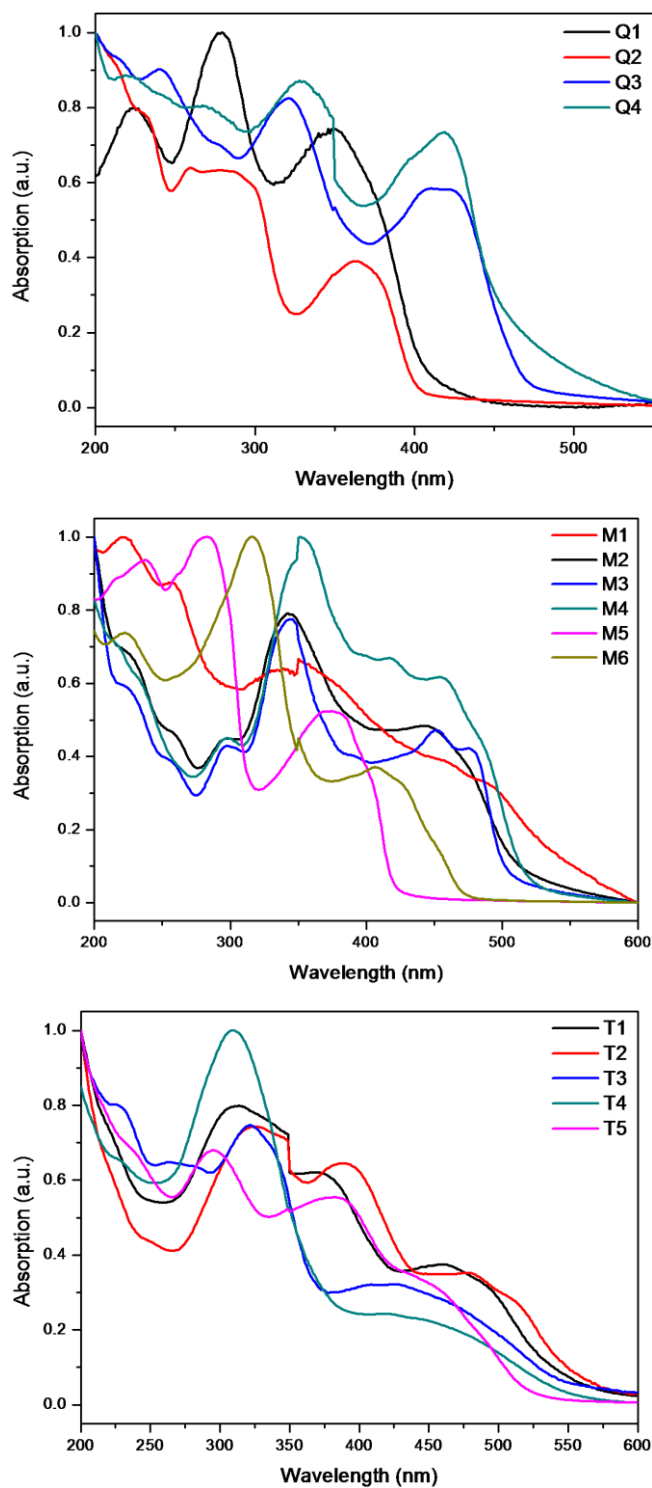

**Fig. S40.** PL spectra (normalized, in  $\text{CHCl}_3$  solution) of quinoxaline triads **T1–T5**

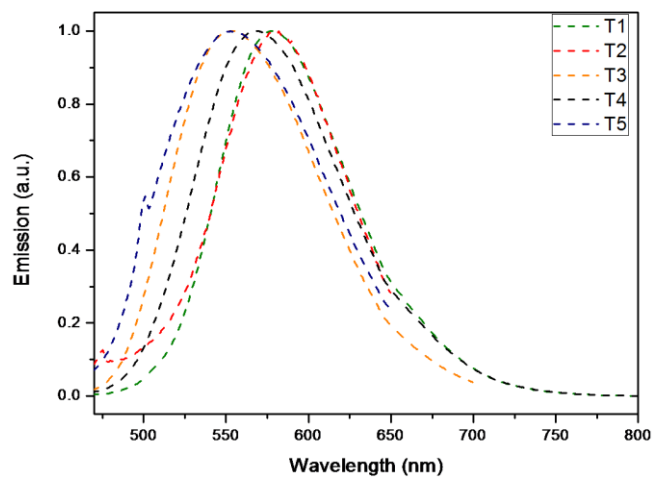

Supplement: c3ob41059e.pdf [file c3ob41059e.pdf]
